# Supplementary material for: Genomic and transcriptomic hallmarks of poorly differentiated and anaplastic thyroid cancers
Source: JCI journal article supplement (doi:10.1172/jci85271), 2016-02-14
Supplement: sd1 [file 1]

**SUPPLEMENTARY MATERIAL from:**

**Genomic and Transcriptomic Hallmarks of Poorly-Differentiated and Anaplastic Thyroid Cancers**

Landa I, Ibrahimpasic T, Boucai L, Sinha R, Knauf JA, Shah RH, Dogan S, Ricarte-Filho JC, Krishnamoorthy GP, Xu B, Schultz N, Berger MF, Sander C, Taylor BS, Ghossein R, Ganly I, Fagin JA

## SUPPLEMENTARY FIGURE LEGENDS

**Supplementary Figure S1. Diagrams showing mutation location, count and alteration type for common somatic variants in ATCs and PDCs.** Each graph depicts the mutations found in each gene altered in our series of 117 advanced thyroid tumors. Graphs were generated with the MutationMapper tool (v1.0.1) available at cBioPortal (<http://cbioportal.org>). Proteins are represented left to right from N- to C-terminal regions, with aminoacid (aa) positions shown on the X-axis and with main domains highlighted. Location of mutations in the protein are depicted as circles, the height of which represents the mutation count for that position, as measured in Y-axis. Circles are color-coded as follows: green= missense; red= truncating (nonsense, nonstop, frameshift deletion, frameshift insertion, splice site); black= in-frame (in-frame deletion, in-frame insertion), blue= promoter mutations; purple= residues affected by different mutation types in the same proportion. Where different mutation types occur at a single position, color is determined by the most frequent mutation type. The most common residue mutated for each protein is spelled out in the graph. **A. BRAF; B. NRAS; C. HRAS; D. KRAS; E. NF1; F. TSHR; G. STK11; H. EIF1AX; I. PIK3CA; J. PTEN; K. TERT promoter; L-P.** Tumor suppressor genes frequently mutated; **L. TP53; M. ATM; N. RB1; O. NF2; P. MEN1; I, J, Q-Y.** PI3K/AKT/mTOR pathway proteins; **Q. PIK3C2G; R. PIK3CG; S. PIK3C3; T. PIK3R1; U. PIK3R2; V. AKT3; W. TSC1; X. TSC2; Y. MTOR; Z-AF.** SWI/SNF complex: **Z. ARID1A; AA. ARID1B; AB. ARID2; AC. ARID5B; AD. SMARCB1; AE. PBRM1; AF. ATRX; AG-AJ.** Histone methyltransferases (HMTs): **AG. KMT2A; AH. KMT2C; AI. KMT2D; AJ. SETD2; AK-AM.** Mismatch excision repair (MMR): **AK. MSH2; AL. MSH6; AM. MLH1; AN-AQ.** Proteins involved in histone acetylation; **AN. CREBBP; AO. EP300; AP. BCOR; AQ. BCL6; AR-AV.** Receptor tyrosine kinases; **AR. EGFR; AS. EPHA3; AT. FLT1 (VEGFR1); AU. FLT4 (VEGFR3); AV. KDR (VEGFR2); AW-AZ.** NOTCH: **AW. NOTCH1; AX. NOTCH2; AY. NOTCH3; AZ. NOTCH4; BA. PRKAR1A; BB. DIS3; BC. FAT1; BD. POLE; BE. RBM10; BF. RAD54L; BG. RECQL4; BH. SF3B1; BI. CDKN1B; BJ. CDKN2A; BK. CDKN2C; BL. ERBB2; BM. PTCH1; BN. DAXX.**

**Supplementary Figure S2. Tumor purity of PTCs, PDTCs and ATCs.** **A.** Calculation of tumor purity was based on the assumption that driver mutations are clonal heterozygous events (see Methods). Graph shows percentage of tumor content for 62 PDTCs and 32 ATCs. We applied the same purity calculation method to 286 *BRAF*- or *RAS*-mutated tumors from the PTC-TCGA dataset. Horizontal blue bars show the median value for each tumor type, which is also shown in the adjacent table. p-values were derived from Mann-Whitney tests.

**Supplementary Figure S3. Comparison of copy number calls in a subset of 37 frozen tumors (17 PDTCs and 20 ATCs) by array-CGH vs IMPACT with or without correction for tumor purity.** Examples for chromosome 1p loss (panels **A-C**) and chromosome 20q gain (**D-F**) are shown. Copy number alterations were assessed by an array-CGH platform from Agilent (**A, D**) and by MSK-IMPACT targeted sequencing without (**B, E**) or with tumor purity-correction (**C, F**). Samples were ranked based on log-ratio values for identical regions in the respective chromosomes. Sample IDs and log-ratios corresponding to each sample are listed in the figure. **A-C:** The nine tumors with top 1p losses (mostly PDTCs with high tumor content) were similarly detected by both CGH and IMPACT, with minor changes in sample order, although IMPACT showed more negative log-ratios. **D-F:** IMPACT-detected 20q gains (an alteration enriched in ATCs) matched those with the highest log-ratios as called by array-CGH (green), and identified gains in additional highly impure specimens (black), particularly after correcting for tumor purity.

**Supplementary Figure S4. Genome-wide copy number alterations in 117 advanced thyroid cancers.** IGV representation of copy number gains and losses in all chromosomes in 84 PDTCs and 33 ATCs expressed as red (gain) or blue (loss), with shading intensity proportional to the log-ratio (lr) values. Samples are grouped by tumor type and sorted by genetic driver alteration: *BRAF*, *RAS*, fusions (RET/PTC, PAX8-PPARG and ALK), or none/unknown. Color key and annotations are shown on the left.

Top panel shows the eight arm-level regions recurrently gained or lost in PDTCs and ATCs, further discussed in Figure 5 and in the main text.

**Supplementary Figure S5. Extended BRS heatmaps for 17 PDTCs and 20 ATCs.** Heatmaps representing the complete 67-gene BRS signature applied separately to PDTCs (panel **A**) and ATCs (**B**). Expression values are displayed as Z-scores after scaling the values of each gene across the 17 and 20 tumors, respectively. Samples are sorted by ascending BRS score (*BRAF*<sup>V600E</sup>-like on the left and *RAS*-like on the right, within each panel) and annotated for driver alteration. This is an expanded version of Figure 6B, which only shows 26 out of the 67 genes in the signature, and combines PDTCs and ATCs in the same heatmap.

**Supplementary Figure S6. Extended M2 macrophage gene signature heatmap in 37 advanced thyroid tumors.** Unsupervised clustering showing the complete 68-gene signature of “genes overexpressed in M2 macrophages” in 17 PDTCs (green) and 20 ATCs (orange). Expression values are displayed as Z-scores after scaling the values of each gene across the 37 samples. This figure is an expanded version of Figure 7A, which only shows the 11 most discriminative genes out of the total 68 genes in this signature.

**Supplementary Figure S7. TDS heatmap in 37 advanced thyroid tumors.** Unsupervised clustering using the 16-gene TDS signature in 17 PDTCs (green) and 20 ATCs (orange). Expression values are absolute (not scaled across samples) and they match the ones represented in the box-plots shown in Figure 7B.

## SUPPLEMENTARY TABLE LEGENDS

**Supplementary Table S1. Clinicopathological features of 117 advanced thyroid tumors.** Detailed information of the main features of 84 poorly-differentiated (PDTC) and 33 anaplastic thyroid cancers (ATC) reported in the study. All categories and color codes depicted in Figure 1 and summarized in Table 1 are expanded here.

**Supplementary Table S2. Impact of mutation burden on clinicopathological features of advanced thyroid tumors.**

**Supplementary Table S3. Contingency tables for the main genetic alterations found in PDTCs and ATCs.** Mutation distribution and associated tests for all genes/pathways in PDTCs vs. ATCs, as shown in Figure 1. <sup>1</sup> "RAS" category includes *NRAS*, *HRAS* and *KRAS*; <sup>2</sup> "Thyroid fusions" include rearrangements of genes previously reported in thyroid tumors: RET/PTC, PAX8-PPARG and *ALK* fusions; <sup>3</sup> Significant p-values are highlighted in yellow; marginally significant are highlighted in grey; Abbreviations: PDTC= Poorly-Differentiated Thyroid Cancer, ATC= Anaplastic Thyroid Cancer, HMT= histone methyltransferase, MMR= mismatch excision repair.

**Supplementary Table S4. Full list of single nucleotide variants (SNVs) and short indels in 341 genes in 117 advanced thyroid tumors.** Complete list of all variants called in 84 poorly-differentiated (PDTC) and 33 anaplastic thyroid cancers (ATC). The following categories are listed: Tumor type= PDTC or ATC; Sample ID= identification code of each tumor; Alternate ID= alternative tumor identification code; Normal = paired or pooled normal tissue identification code; Gene\_mutation summary= the first column refers to the gene and the second to the protein; Chrom= chromosome number; Coordinate start site= genomic coordinate (hg19); Ref= reference (wildtype) allele; Alt= alternative (mutant) allele; Variant Class= type of alteration, depending on its effect on the protein product; Gene= gene name (HUGO nomenclature); cDNA change= variant nomenclature, based on the complementary DNA coordinates;

AA change= variant nomenclature, based on the change in the protein (AA= aminoacid); dbSNP\_ID= “rs” code from NCBI SNP database (<http://www.ncbi.nlm.nih.gov/snp>); COSMIC\_ID= mutation code from Sanger’s Catalogue of Somatic Mutations in Cancer (COSMIC, <http://cancer.sanger.ac.uk/cosmic>); T\_Total Depth= total number of sequencing reads that include position of variant nucleotide in each sample; T\_Ref Count= number of reads for the reference allele in the tumor; T\_Alt Count= number of reads for the alternative allele in the tumor; T\_Alt Freq= frequency of the alternative allele in the tumor ( $=T\_Alt\ Count/T\_Total\ Depth$ ); N\_Total Depth= total number of sequencing reads in the normal tissue; N\_Ref Count= number of reads for the reference allele in the normal; N\_Alt Count= number of reads for the alternative allele in the normal; N\_Alt Freq= frequency of the alternative allele in the normal ( $=N\_Alt\ Count/N\_Total\ Depth$ ).

**Supplementary Table S5. Clinicopathological characteristics of ATCs and PDTCs according to *BRAF* and *RAS* mutation status and gene fusions.**

**Supplementary Table S6. Clinicopathological characteristics of ATCs and PDTCs according to *EIF1AX* mutation status.**

**Supplementary Table S7. Clinicopathological characteristics of ATCs and PDTCs according to *TERT* promoter mutation status.**

**Supplementary Table S8. Prevalence of common gene mutations in advanced thyroid cancers reported in the literature.** Summary of published studies reporting genetic alterations in PDTCs and/or ATCs for *BRAF*, *RAS*, *RET/PTC*, *TP53*, *PIK3CA*, *PTEN*, *AKT1*, *CTNNB1*, *AXIN1*, *APC*, *TERT* promoter and *EIF1AX*.

**Supplementary Table S9. Tumor characteristics and gene expression results of 37 advanced thyroid tumors.** Characteristics of the 17 PDTCs and 20 ATCs frozen tissues used for gene expression studies. Sample types, tumor purity and driver alterations are listed. Individual gene expression scores for the

following signatures are shown: BRAF-RAS score (BRS; see as well Figures 6B, C and Supplementary Figure S5), M2 macrophage signature (Figure 7A and Supplementary Figure S6) and the thyroid differentiation score (TDS, Figure 7B-D and Supplementary Figure S7). Average expression values are listed for all three signatures for each sample, and individual expression values (relative to all genes expressed) are given for the 16 thyroid genes that define the TDS.

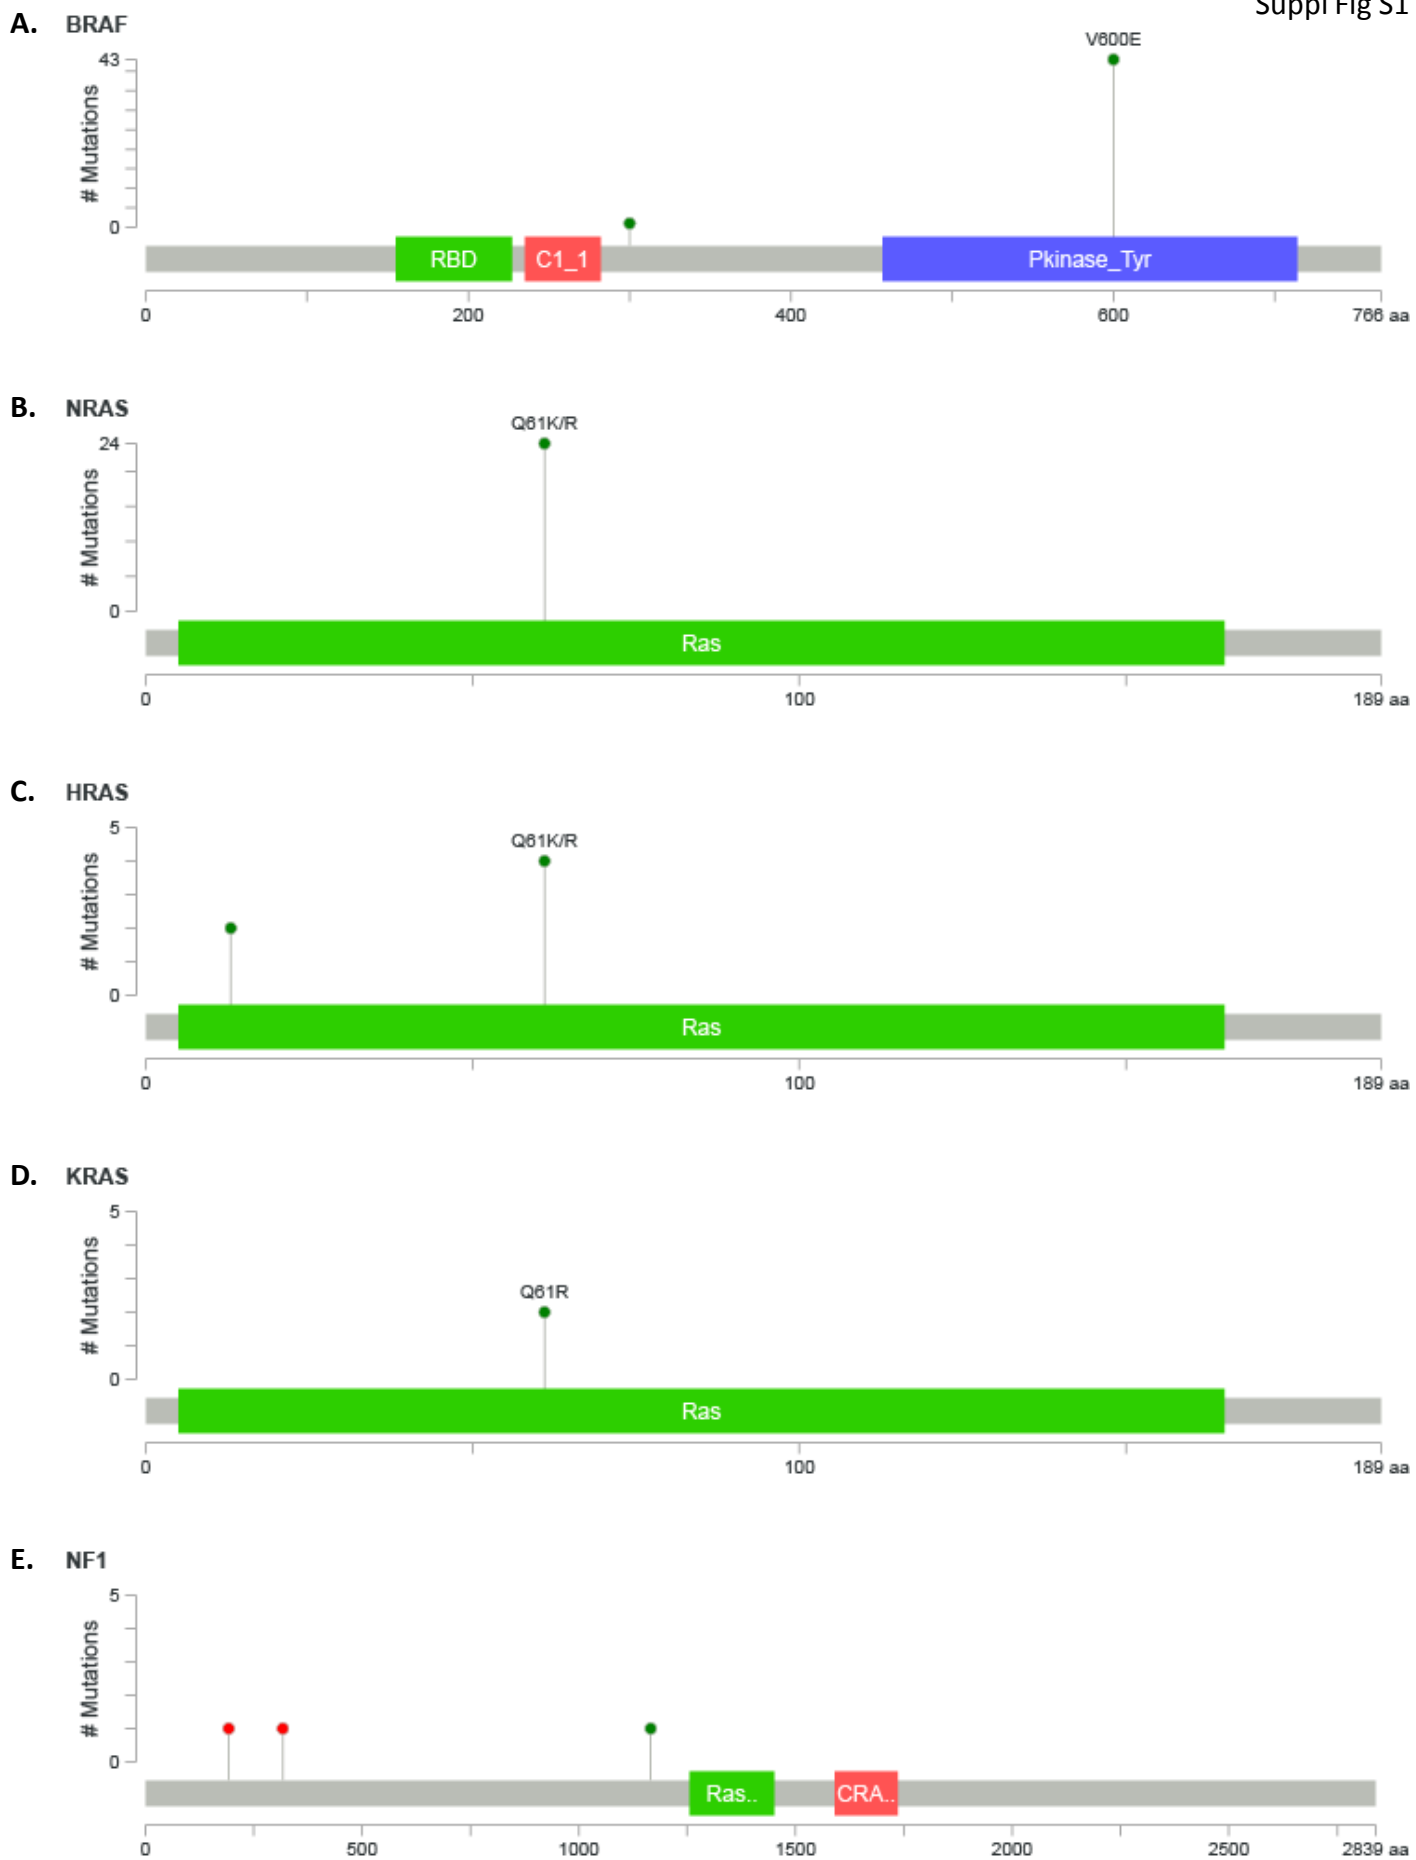



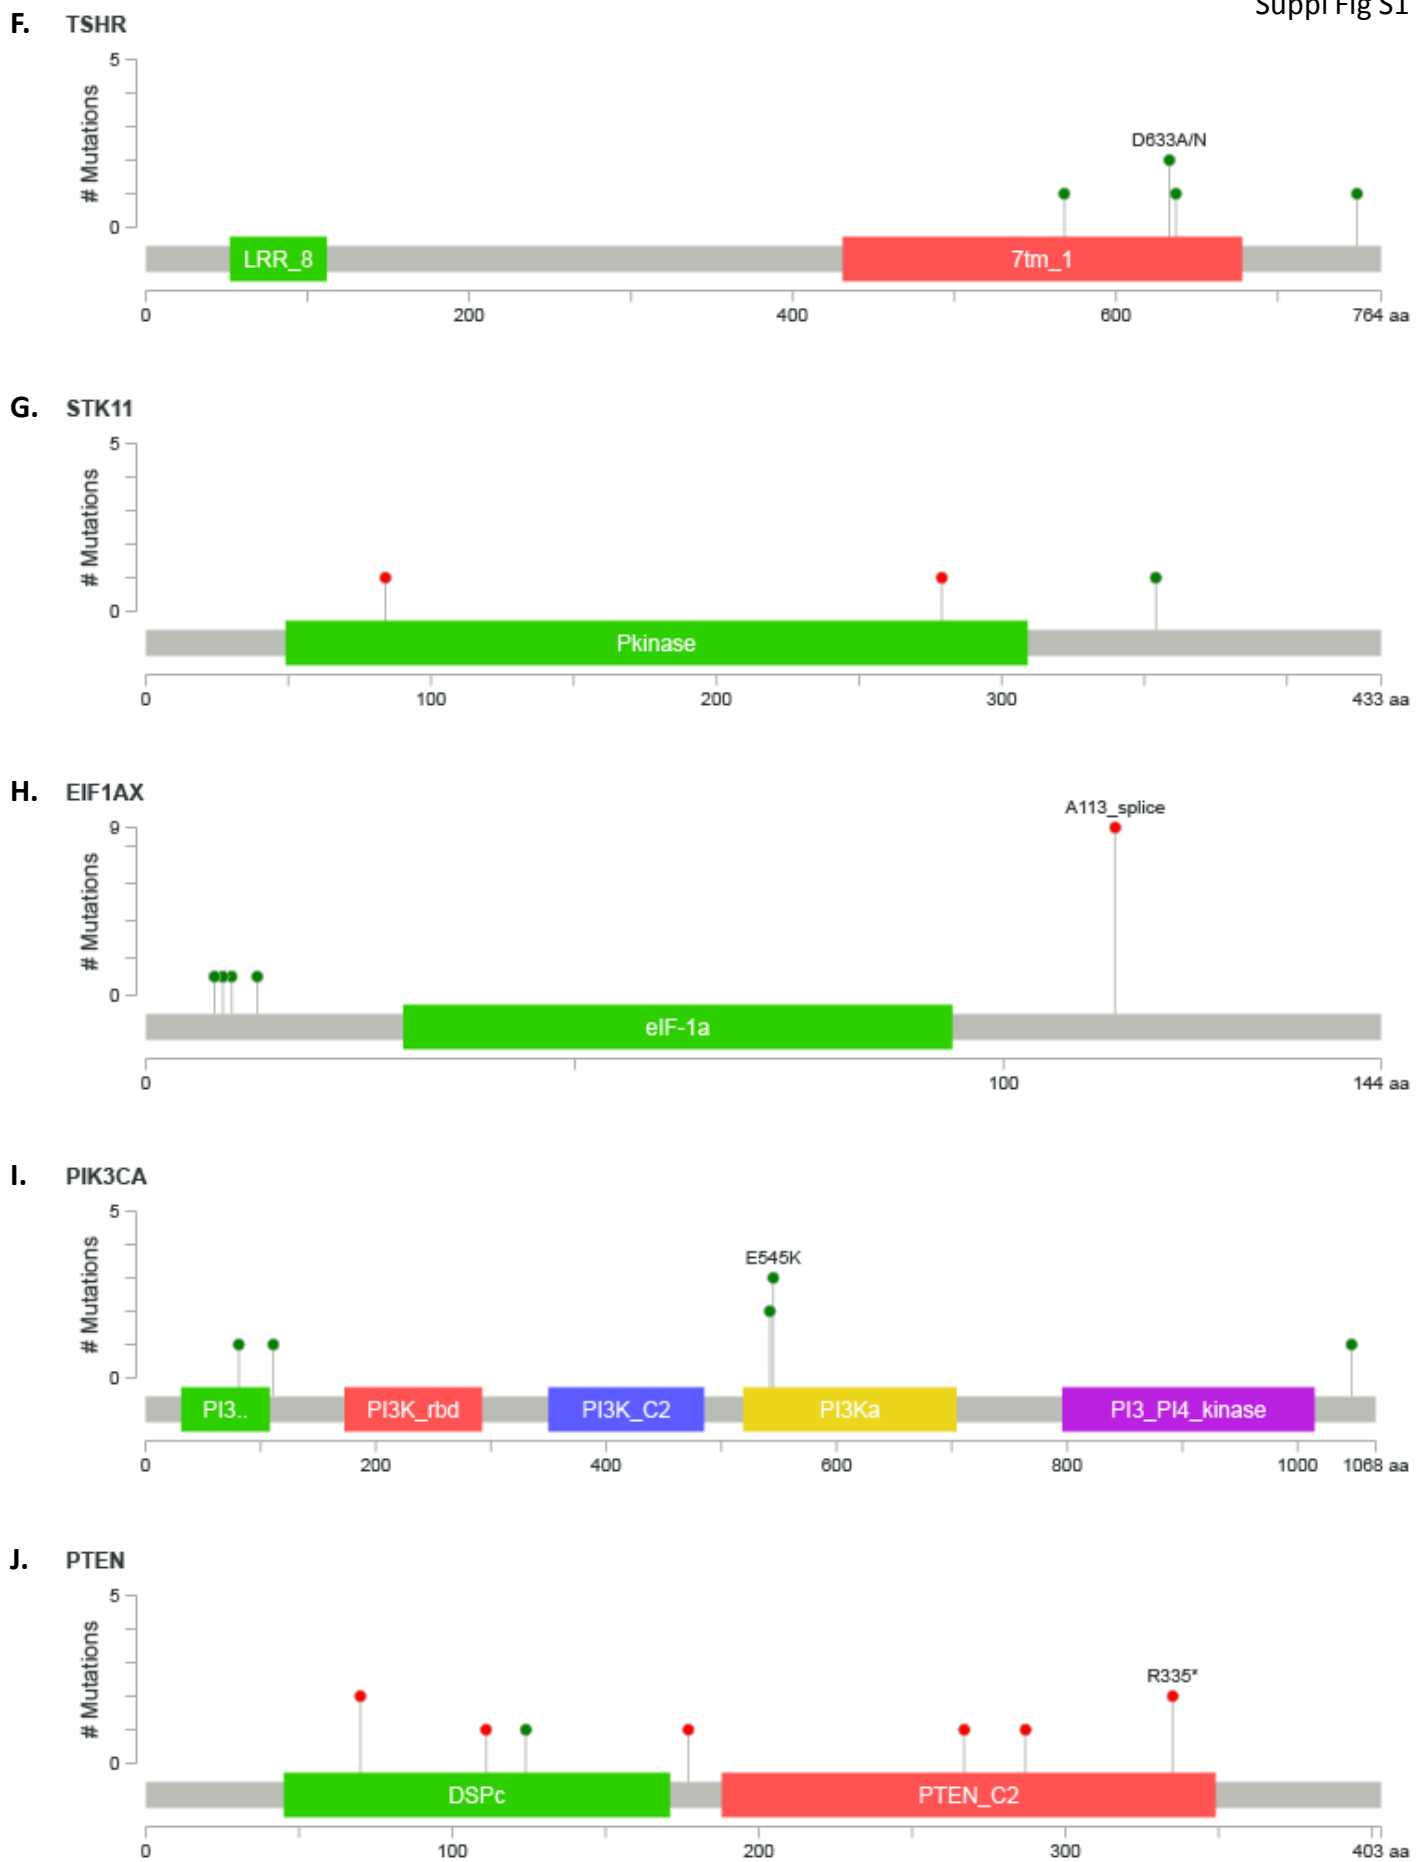

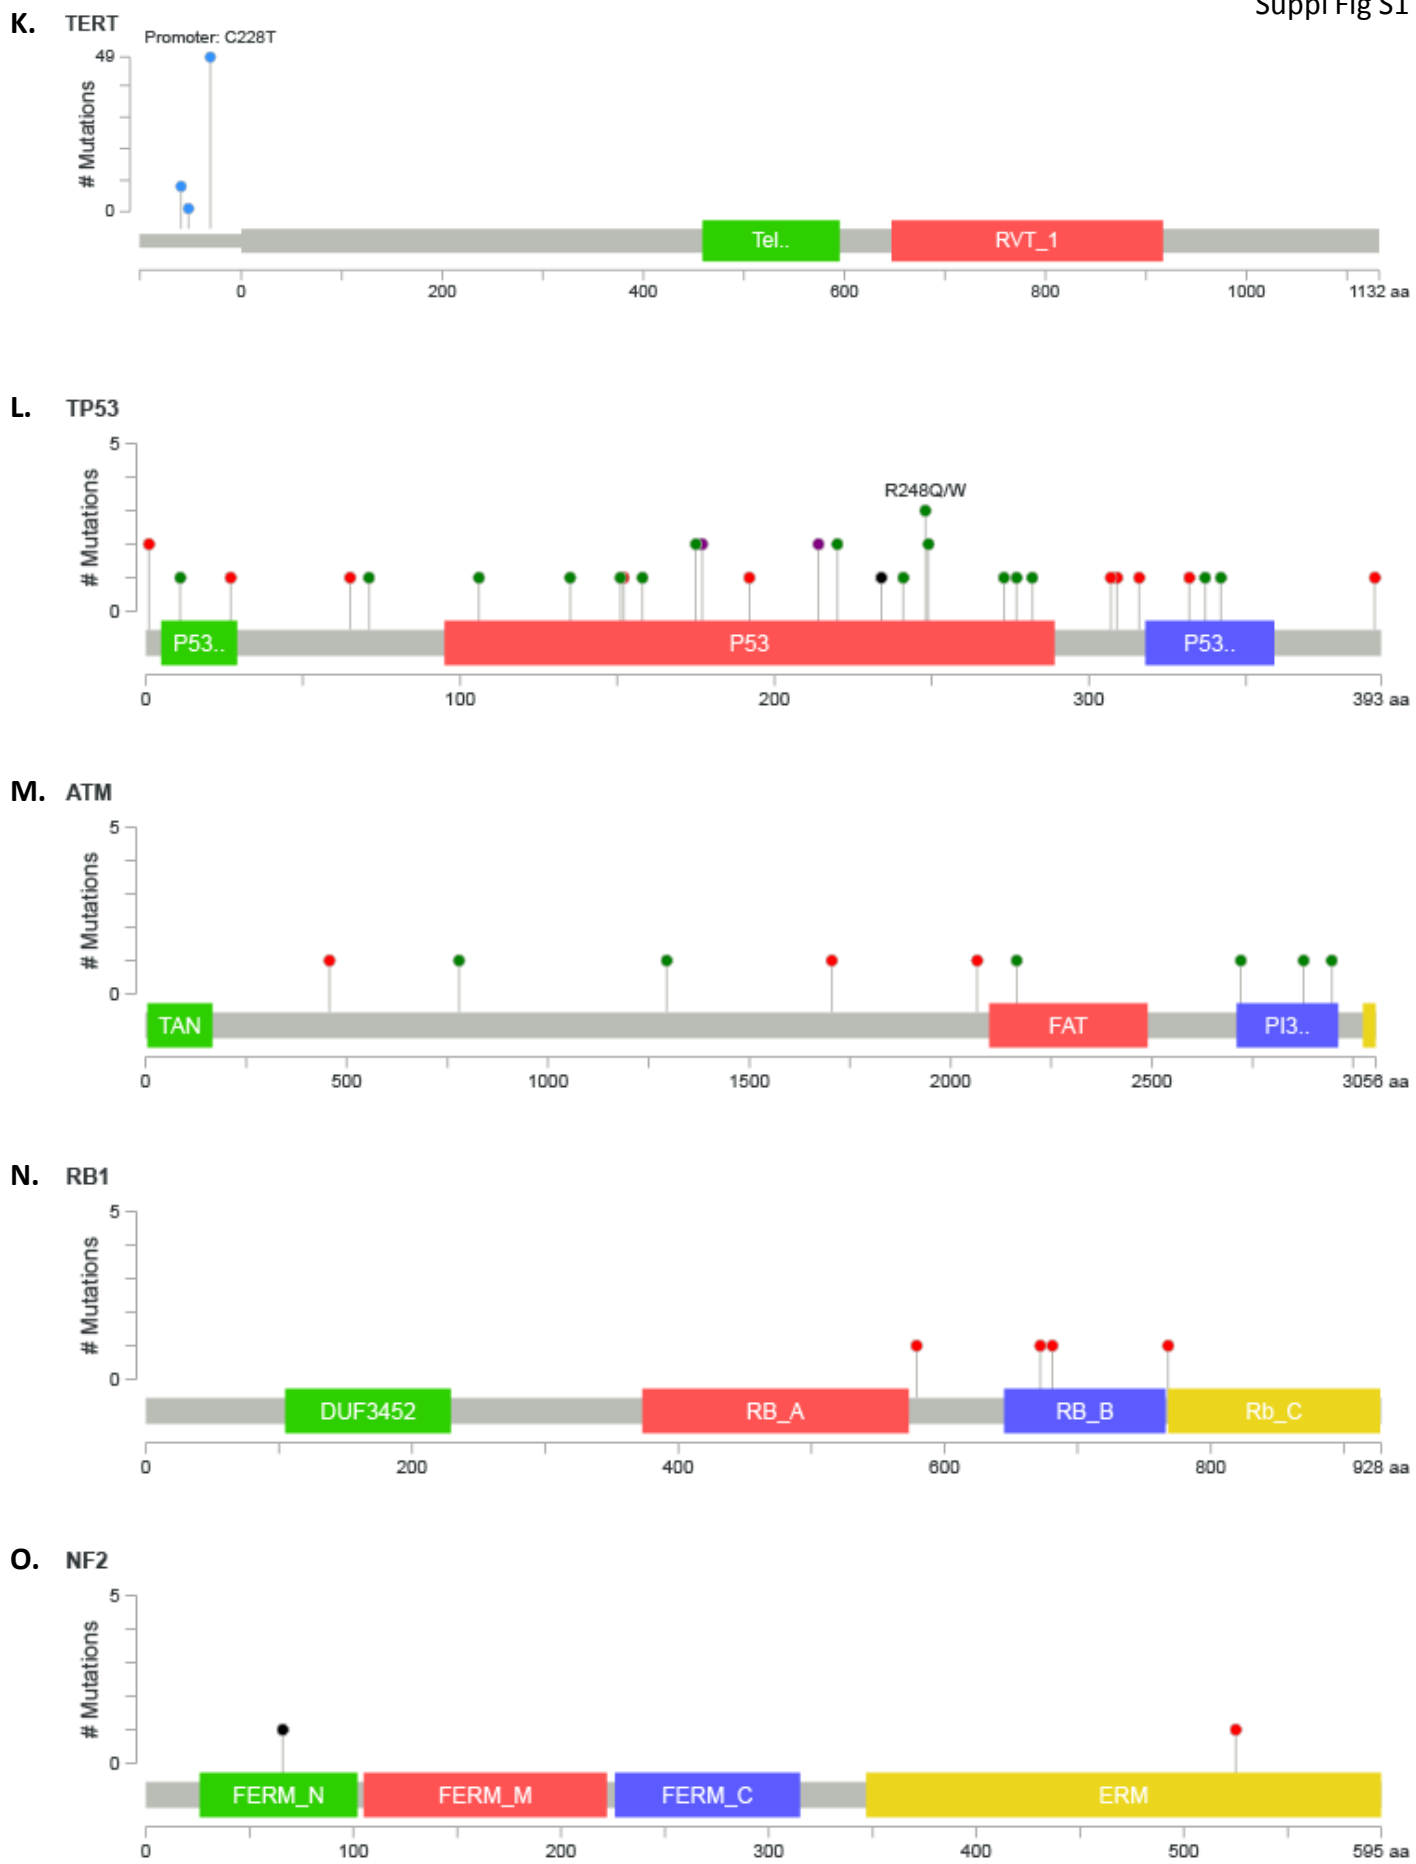

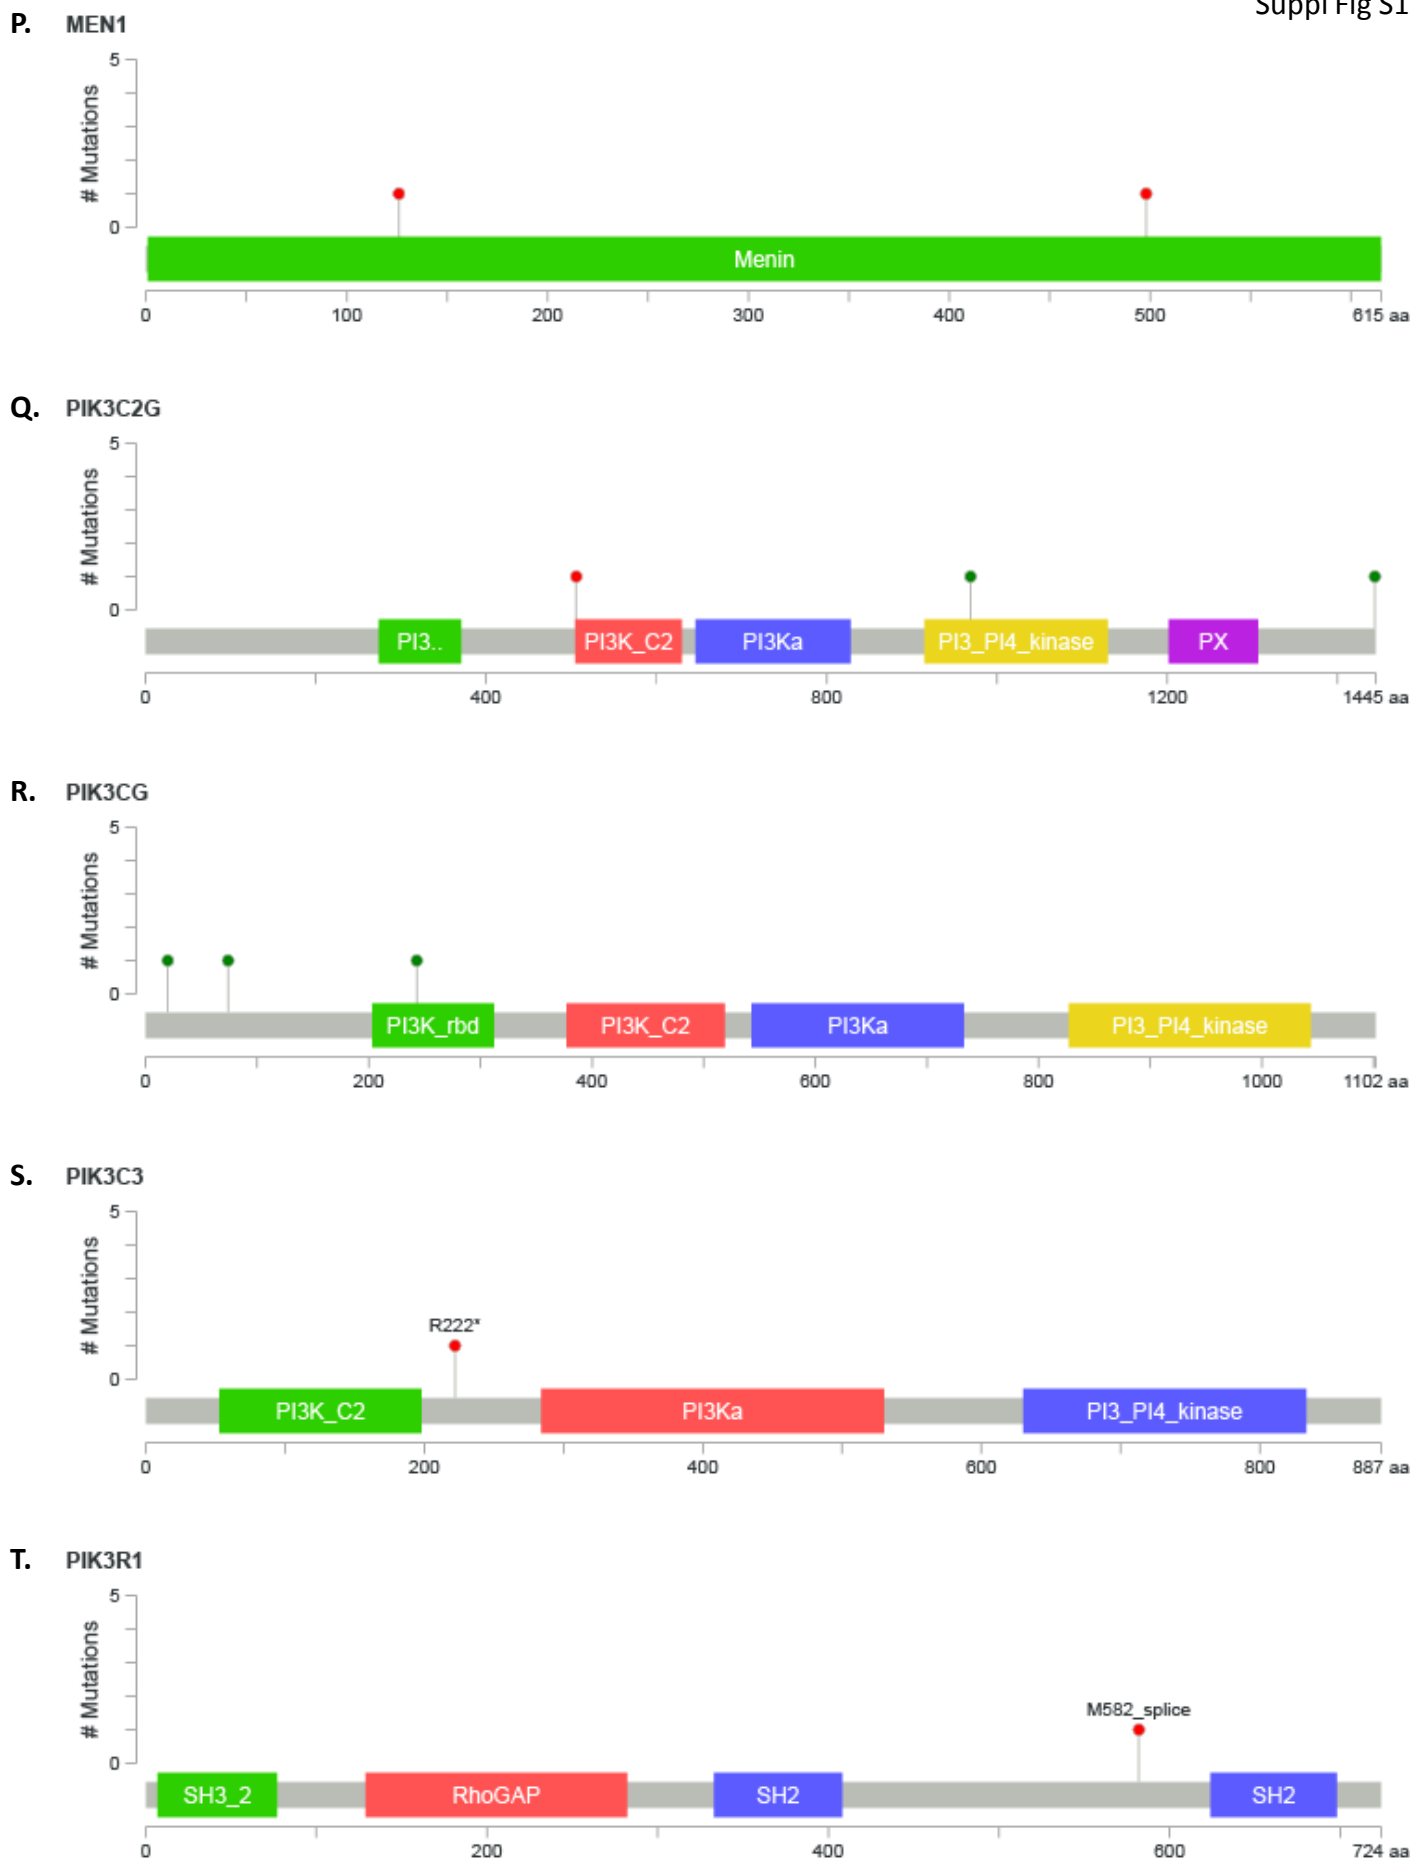

## U. PIK3R2

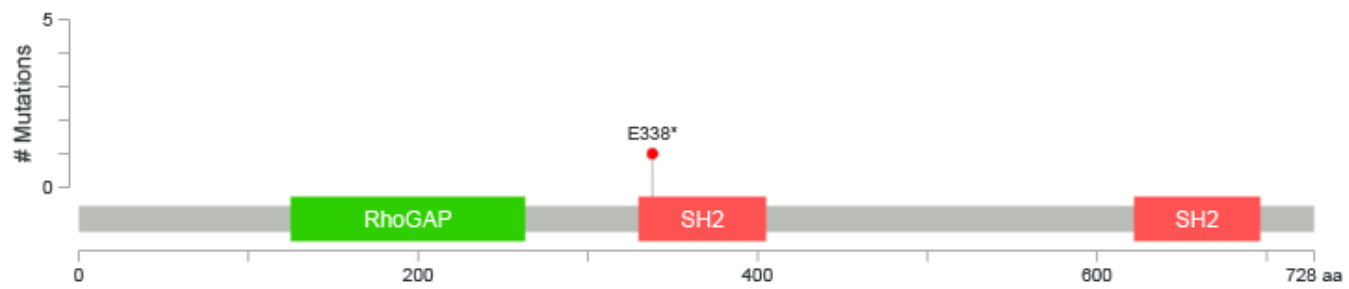

## V. AKT3

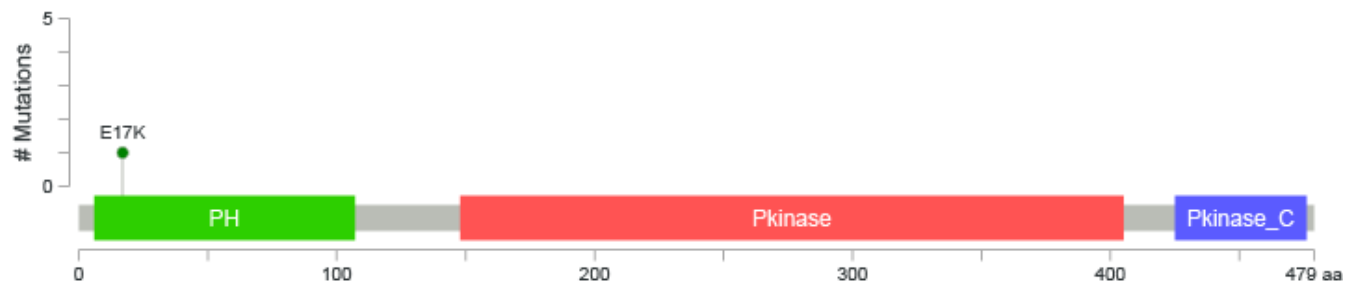

## W. TSC1

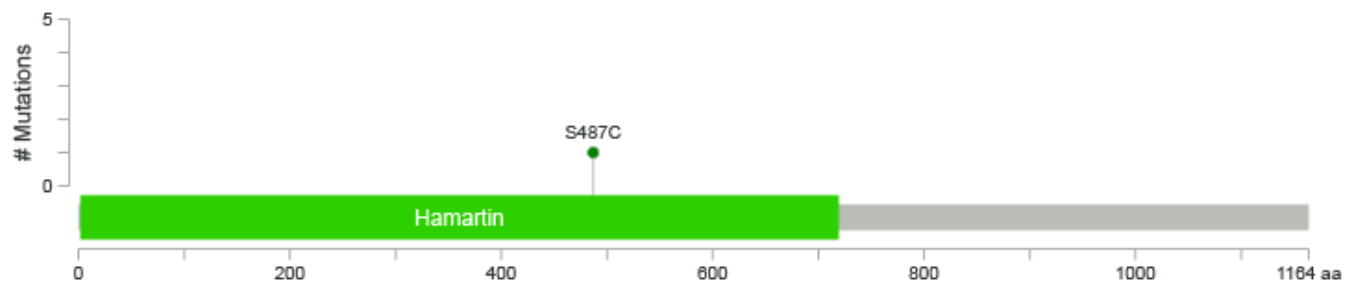

## X. TSC2

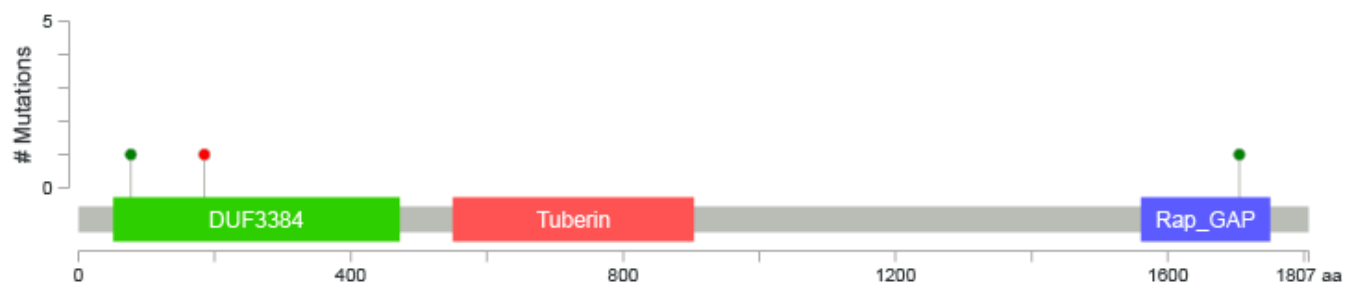

## Y. MTOR

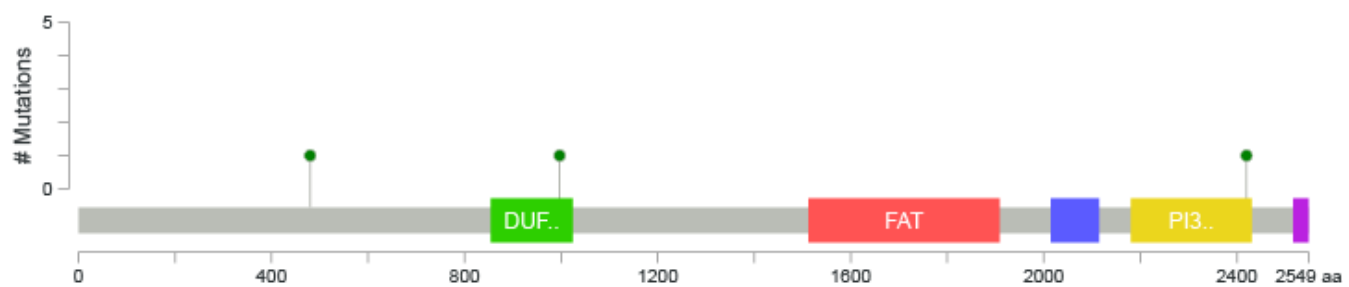

**Z. ARID1A**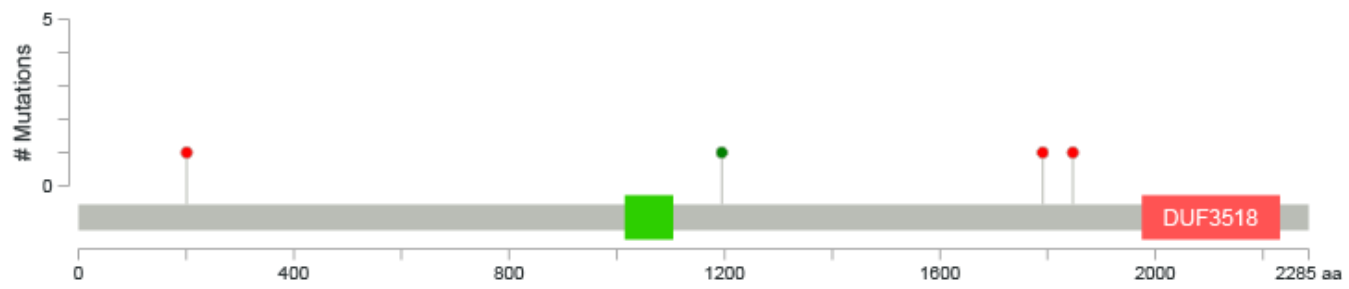**AA. ARID1B**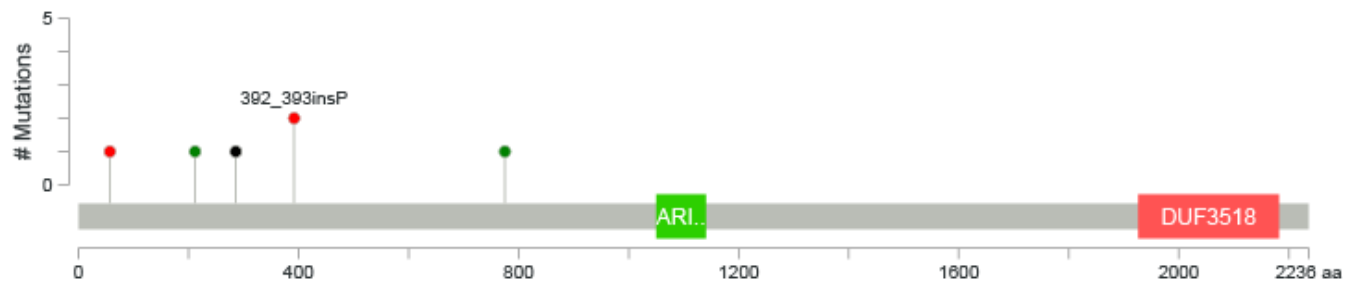**AB. ARID2**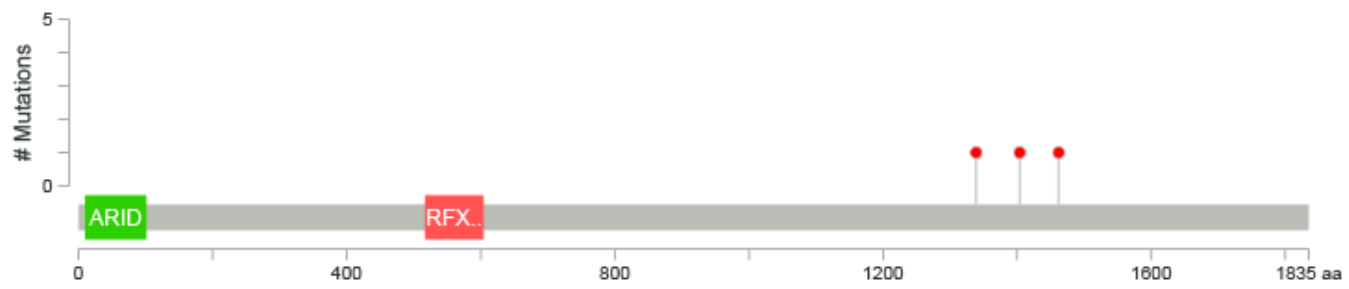**AC. ARID5B**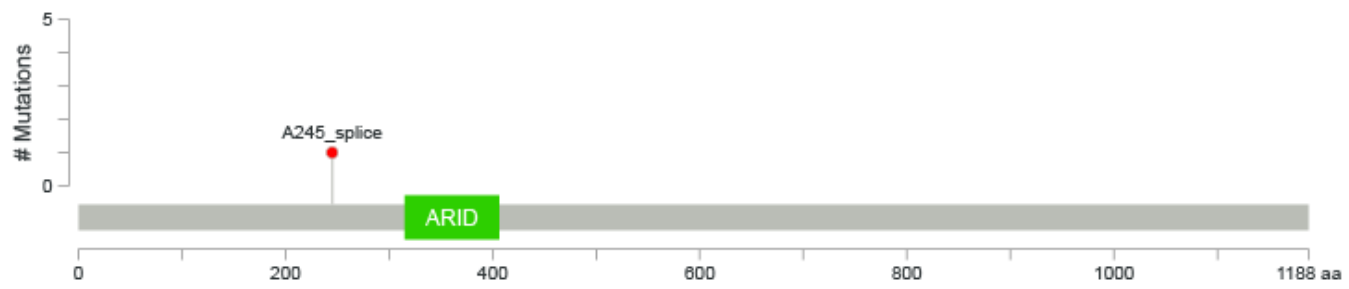**AD. SMARCB1**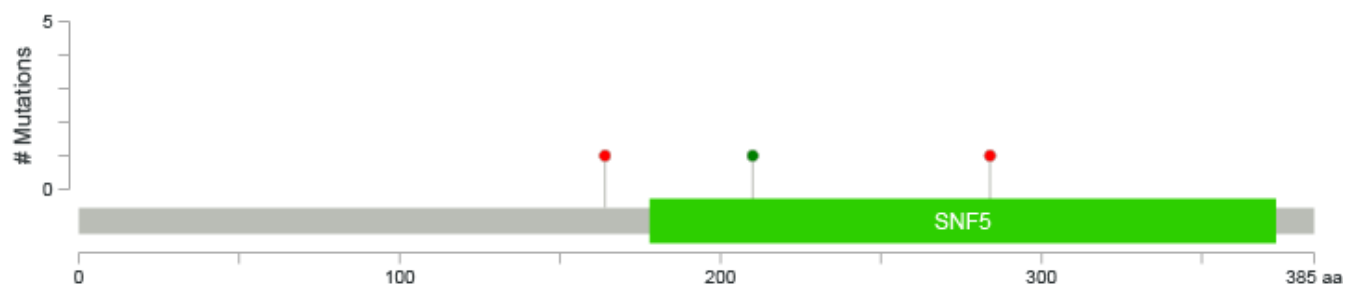

**AE. PBRM1**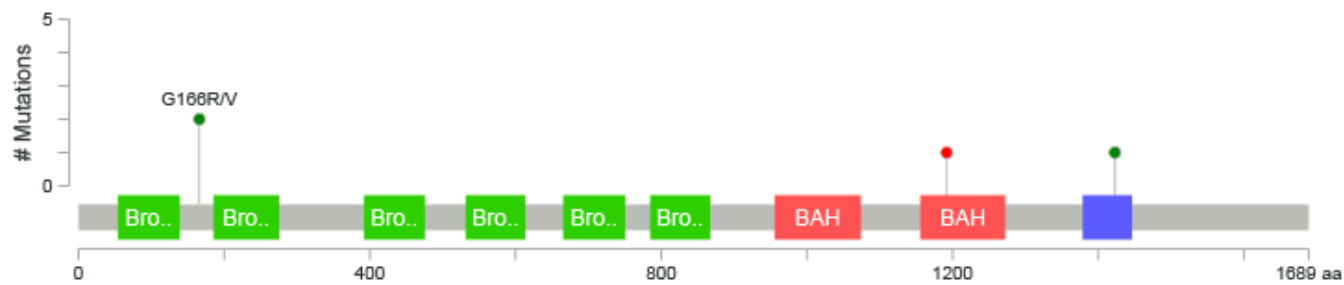**AF. ATRX**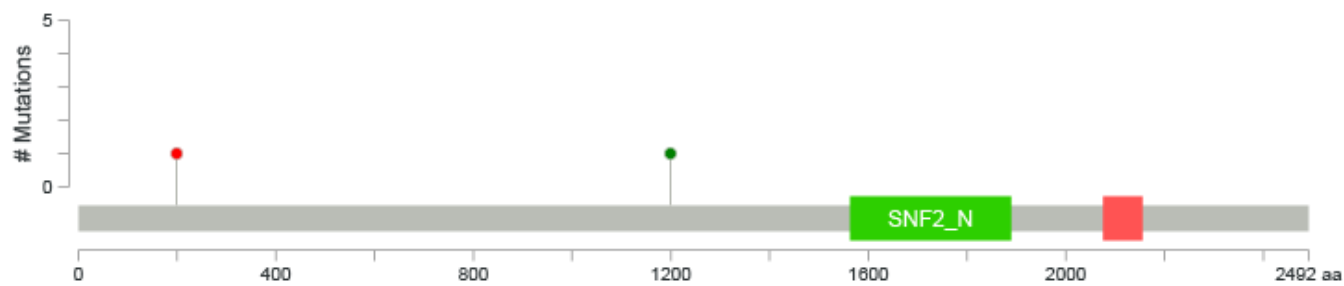**AG. KMT2A**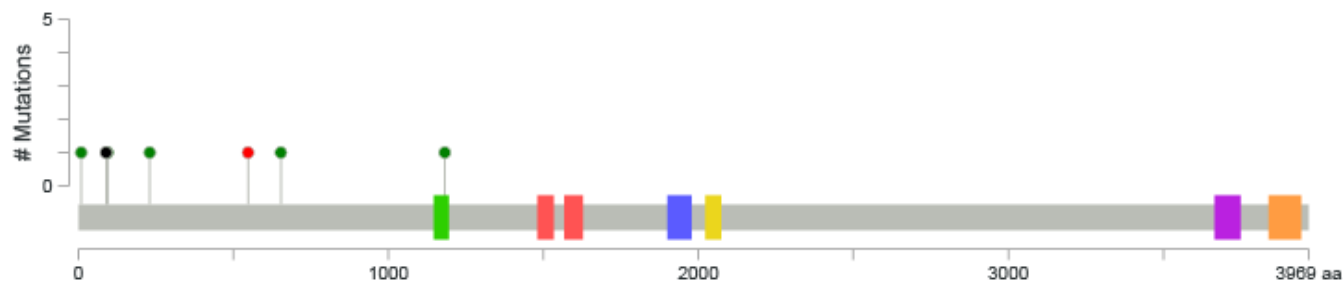**AH. KMT2C**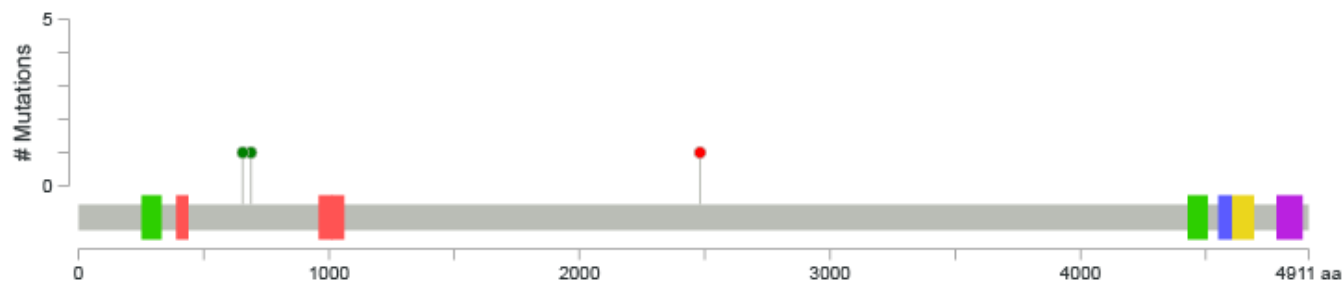**AI. KMT2D**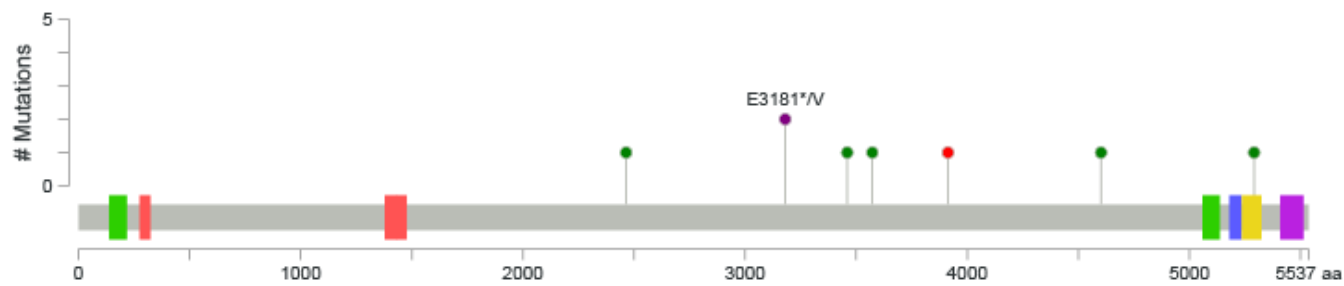

**AJ. SETD2**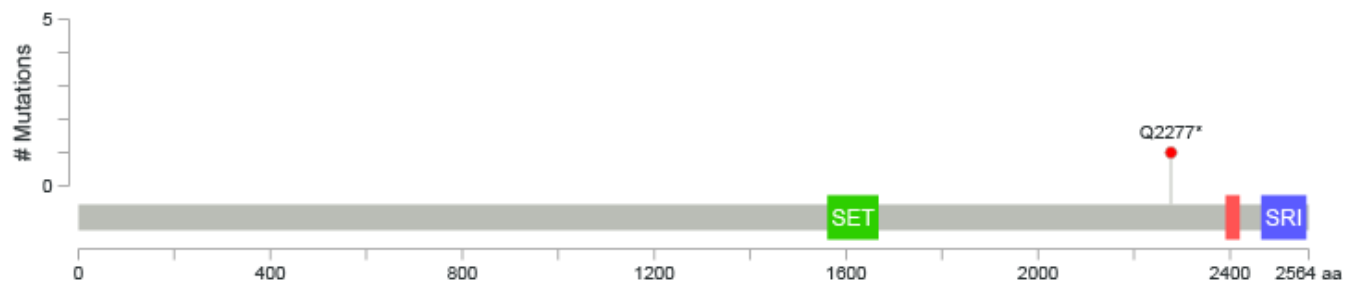**AK. MSH2**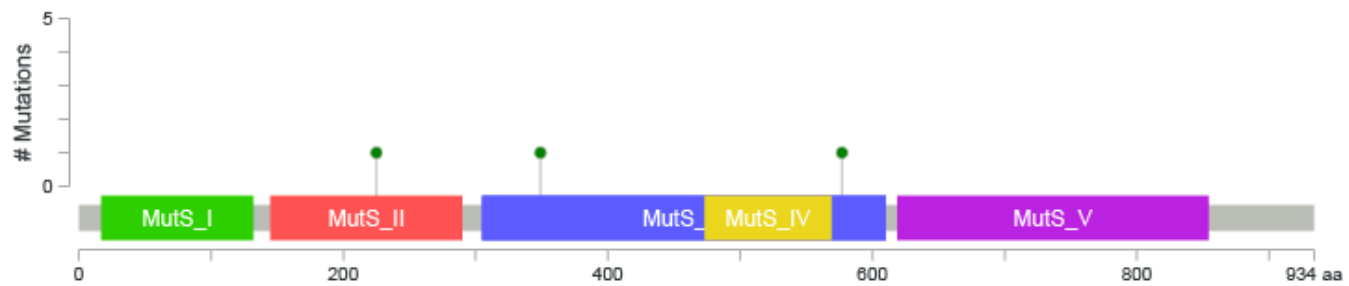**AL. MSH6**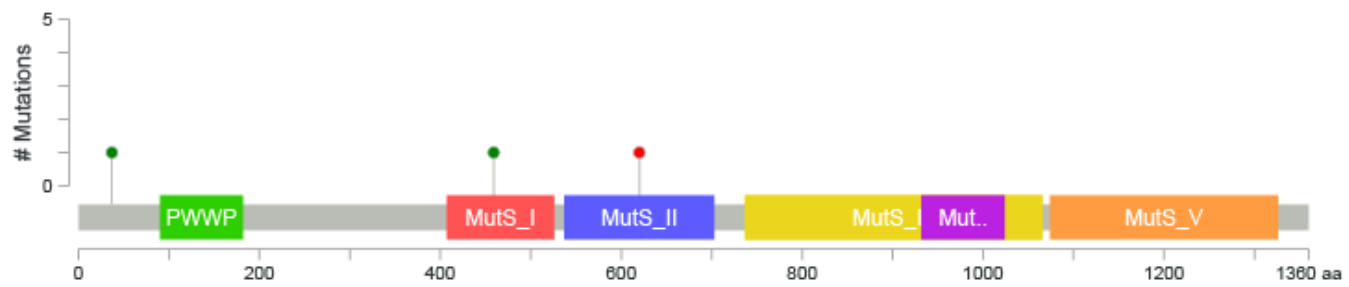**AM.MLH1**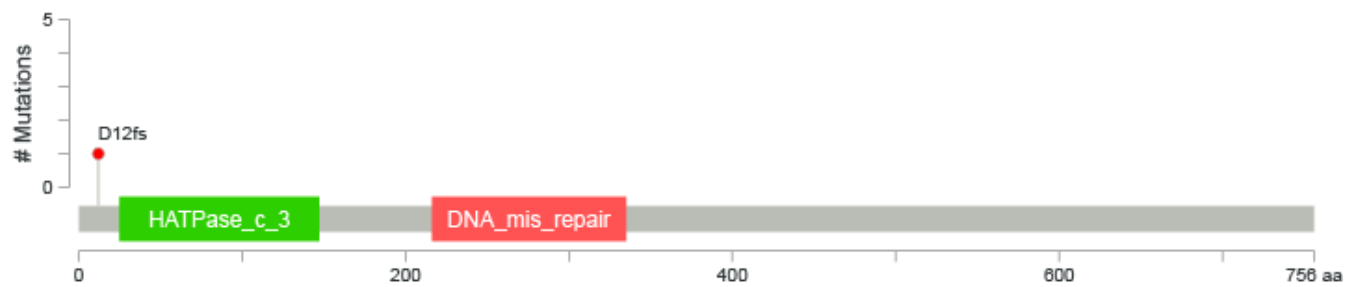**AN. CREBBP**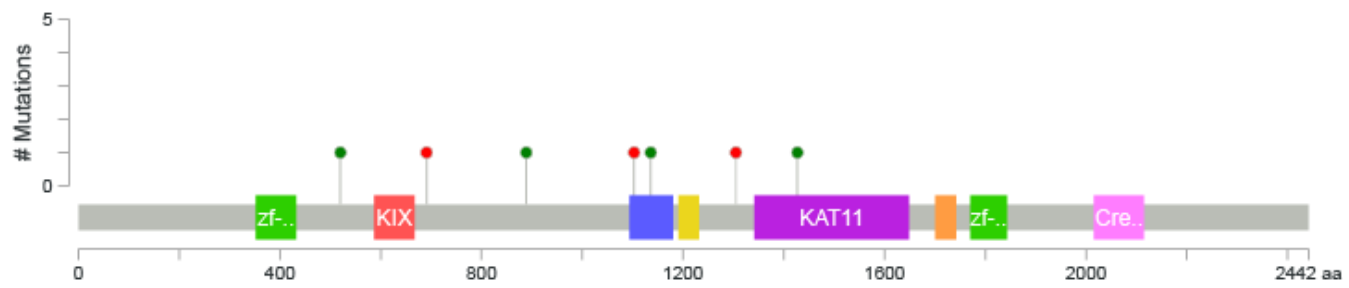

## AO. EP300

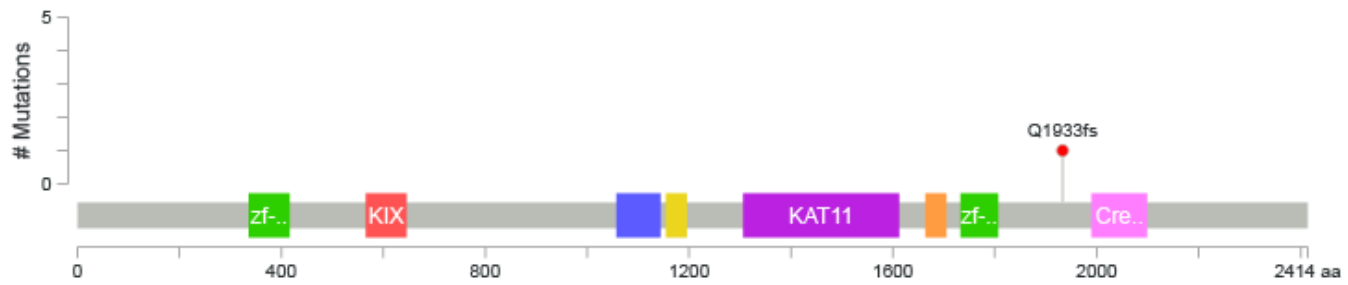

## AP. BCOR

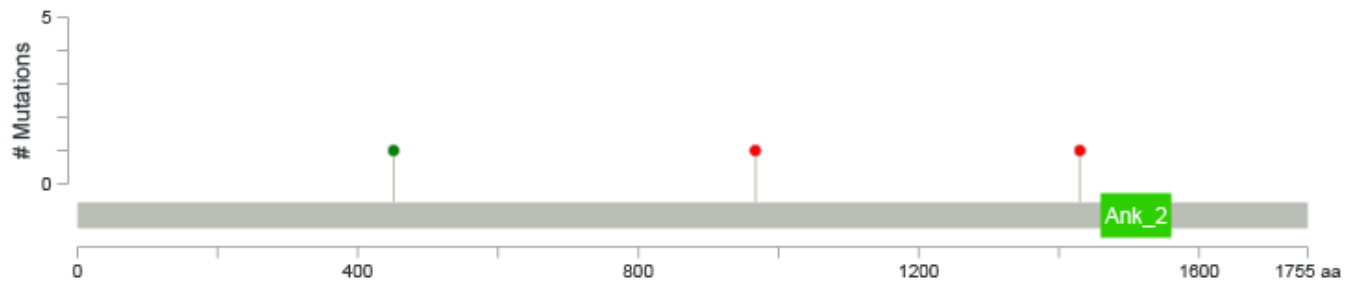

## AQ. BCL6

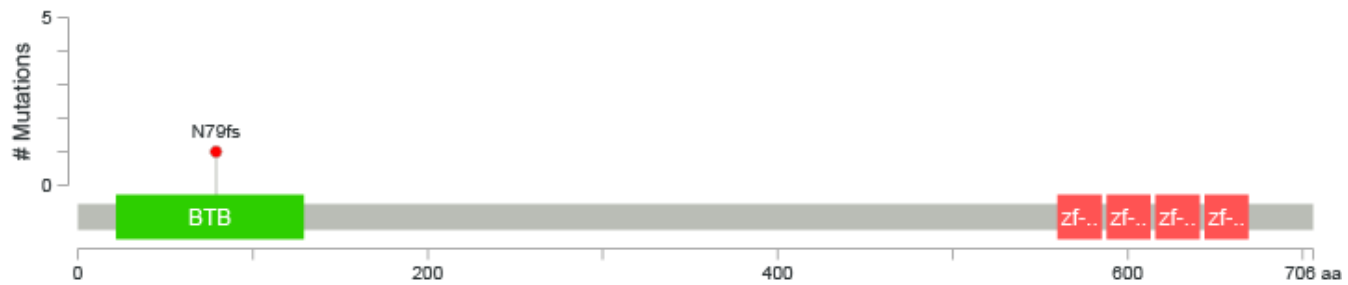

## AR. EGFR

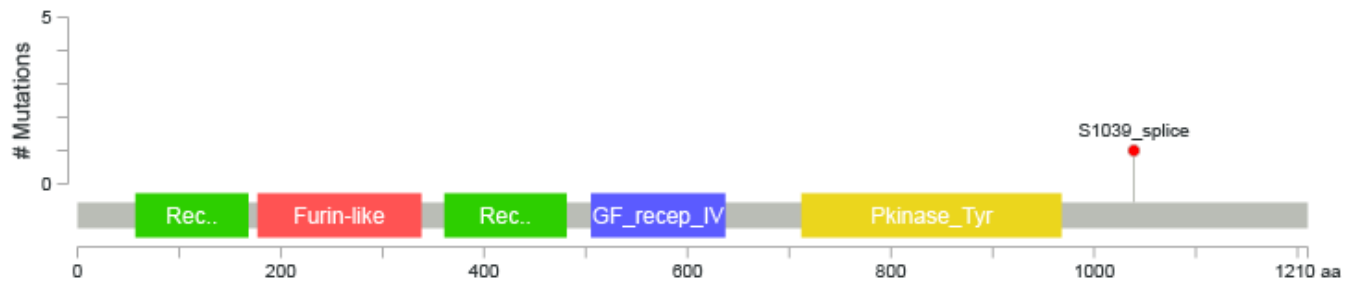

## AS. EPHA3

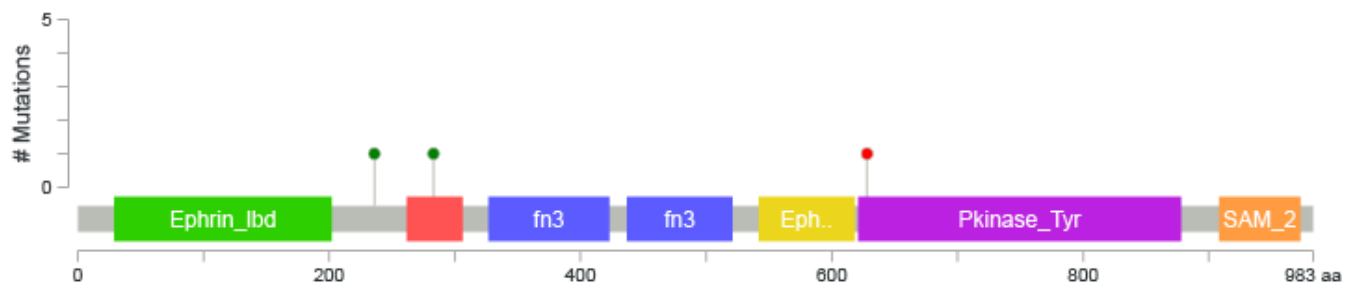



**AT. FLT1**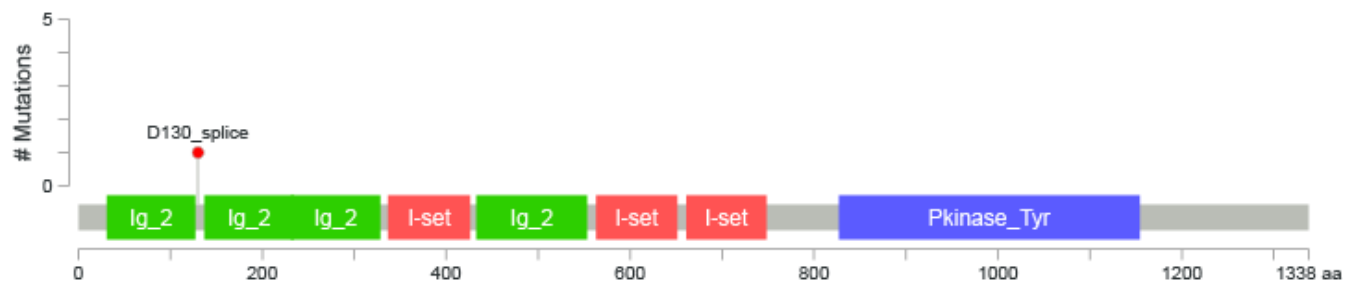**AU. FLT4**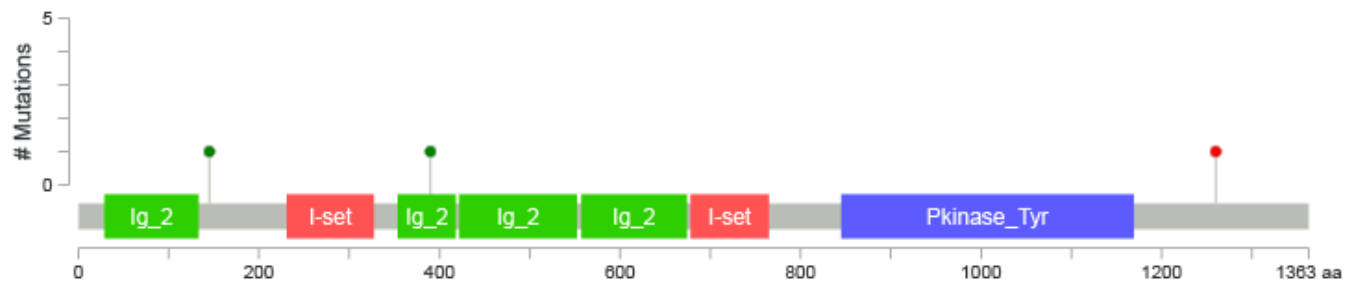**AV. KDR**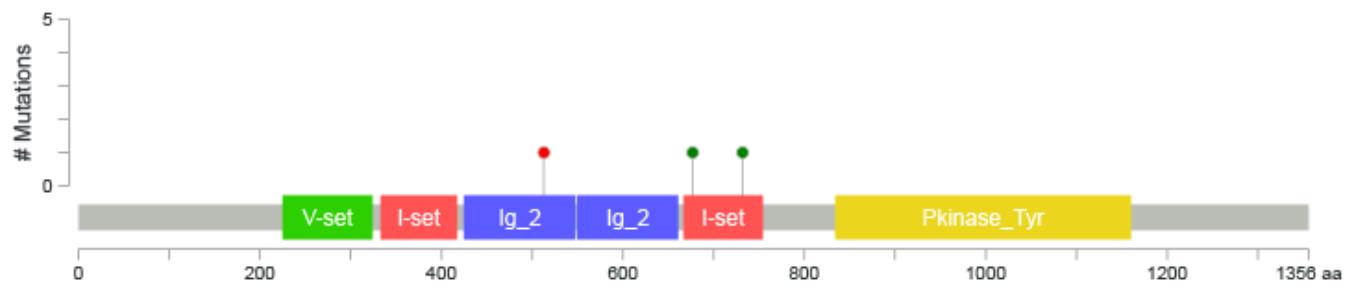**AW. NOTCH1**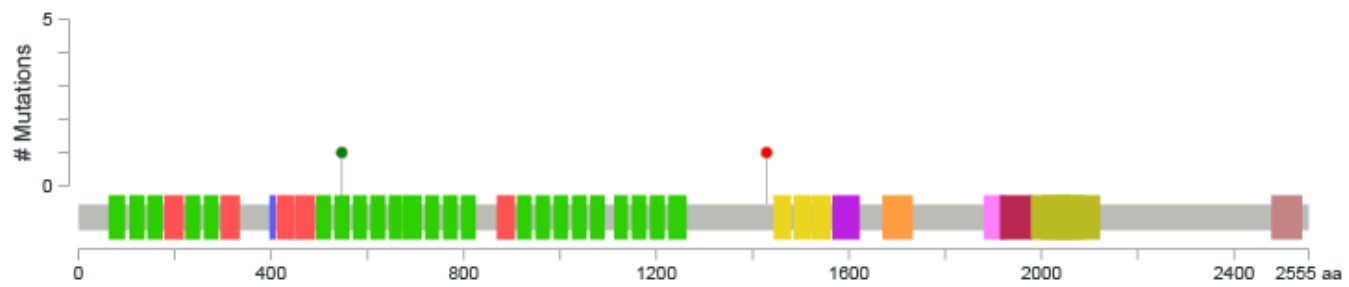**AX. NOTCH2**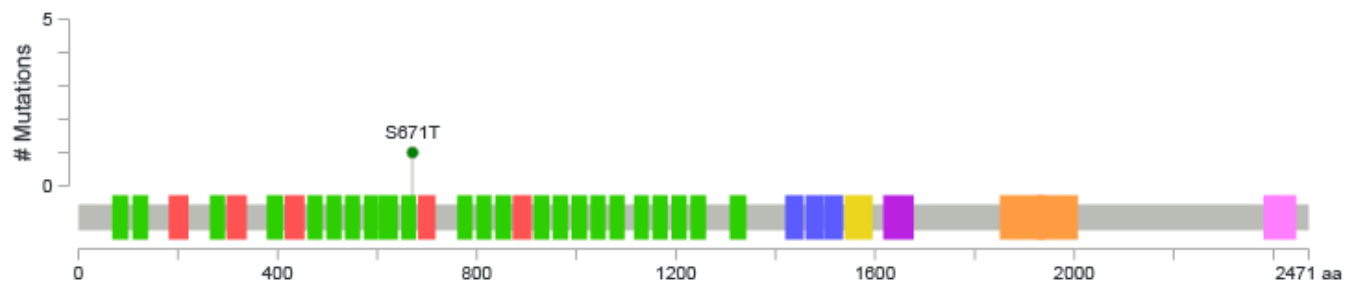

**AY. NOTCH3**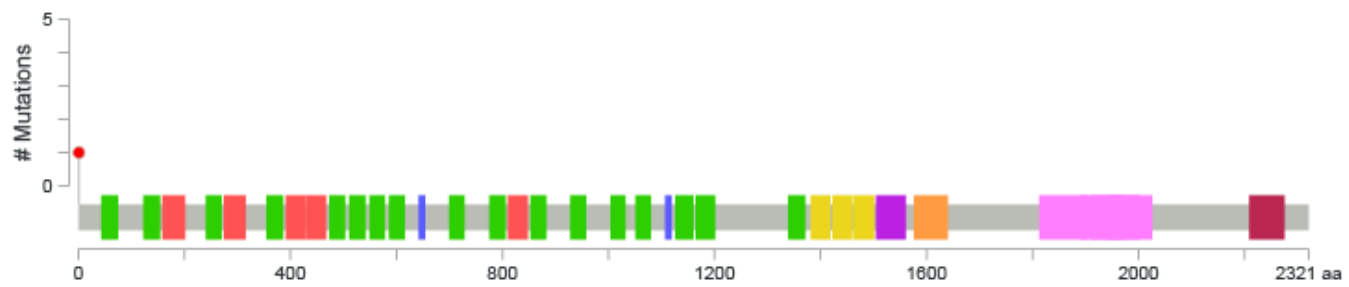**AZ. NOTCH4**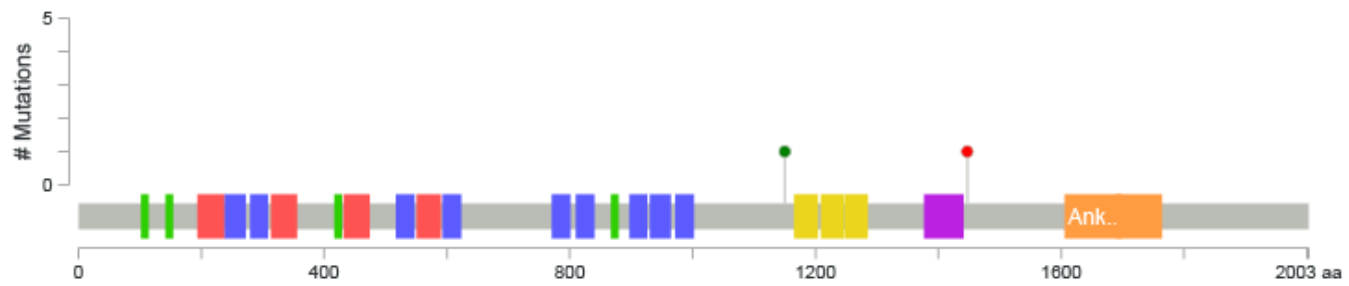**BA. PRKAR1A**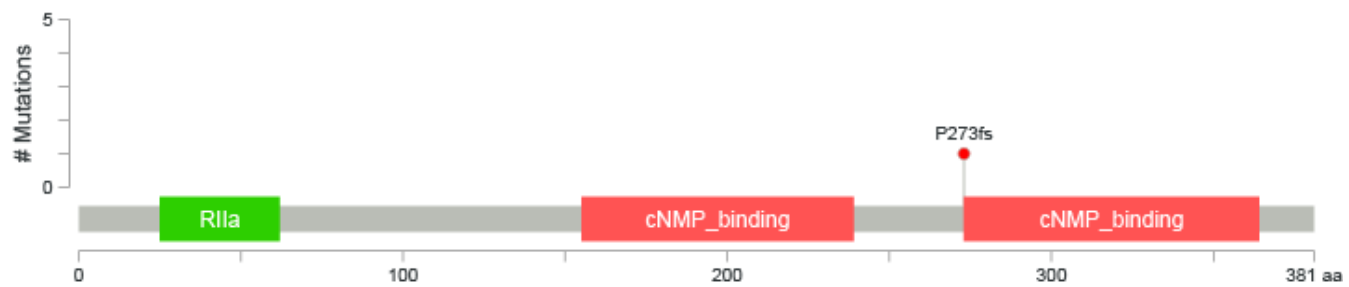**BB. DIS3**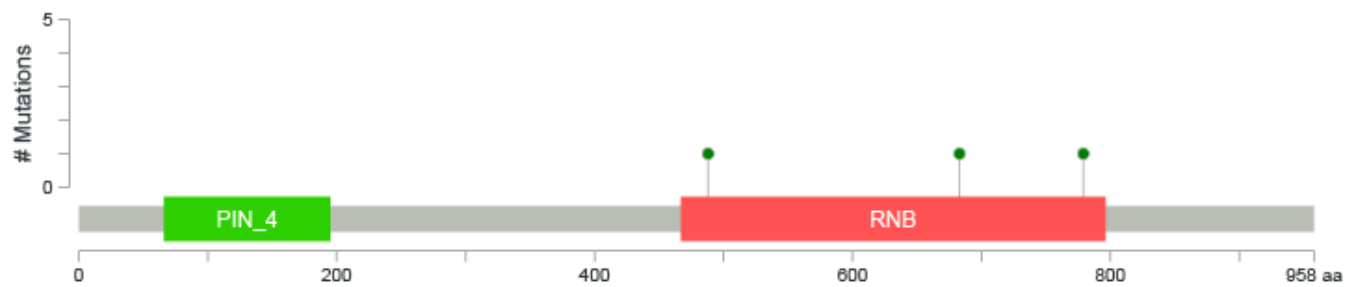**BC. FAT1**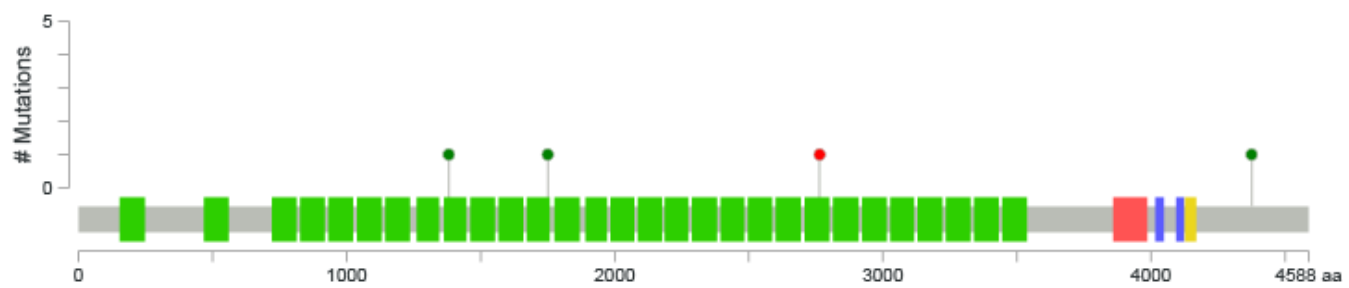

**BD. POLE**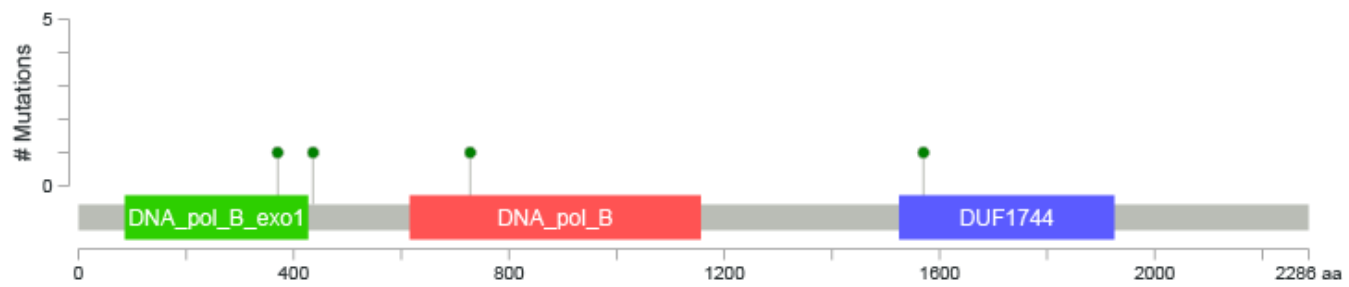**BE. RBM10**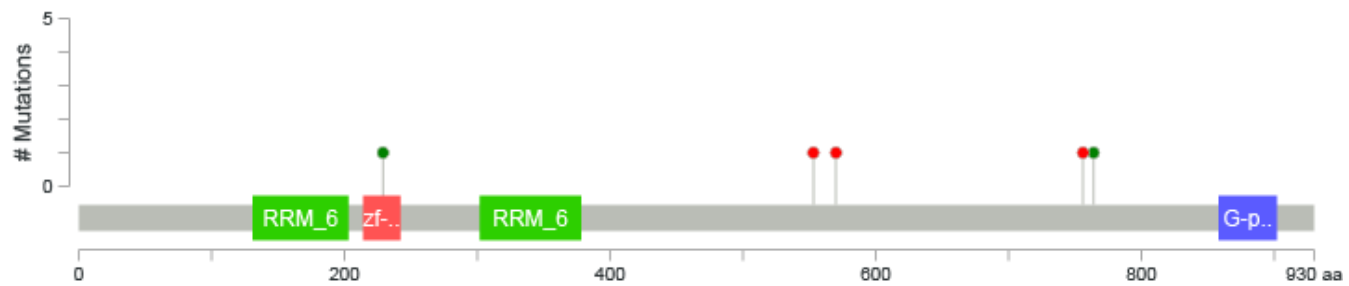**BF. RAD54L**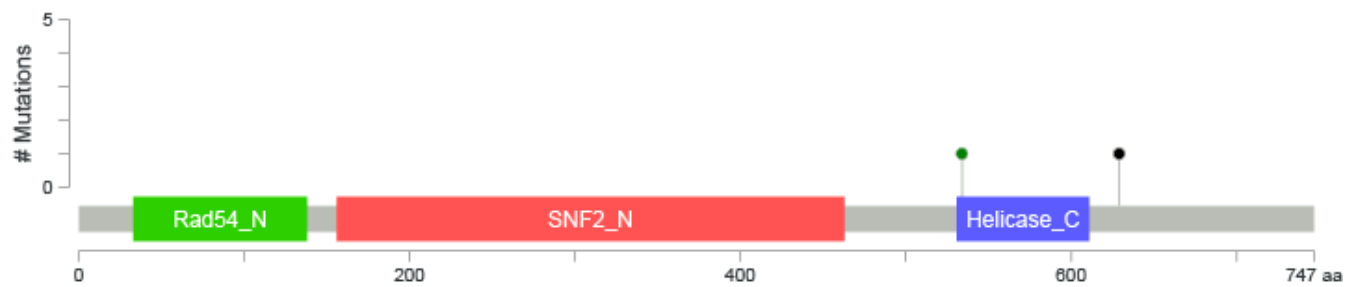**BG. RECQL4**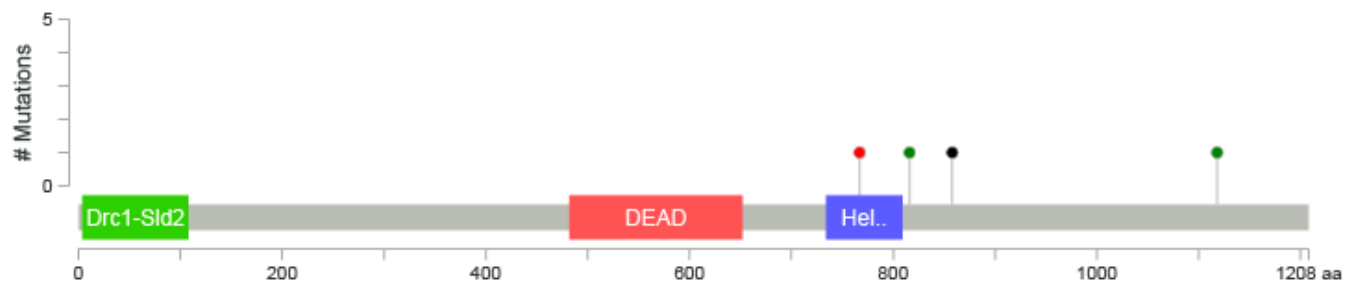**BH. SF3B1**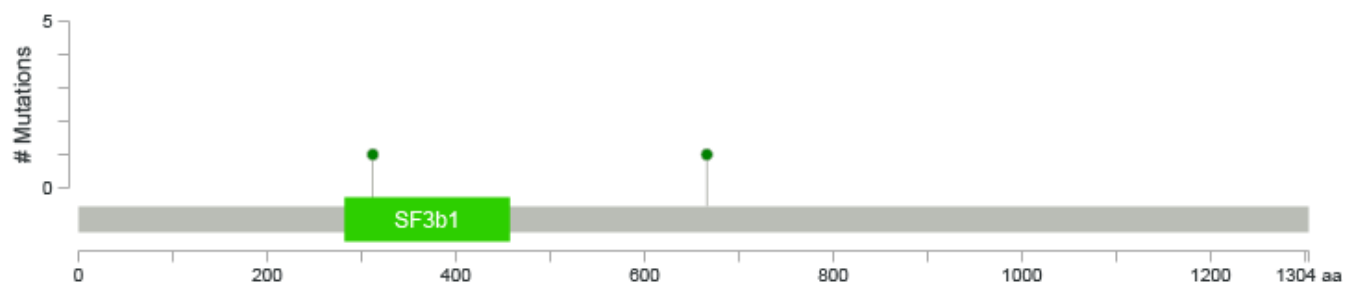

**BI. CDKN1B**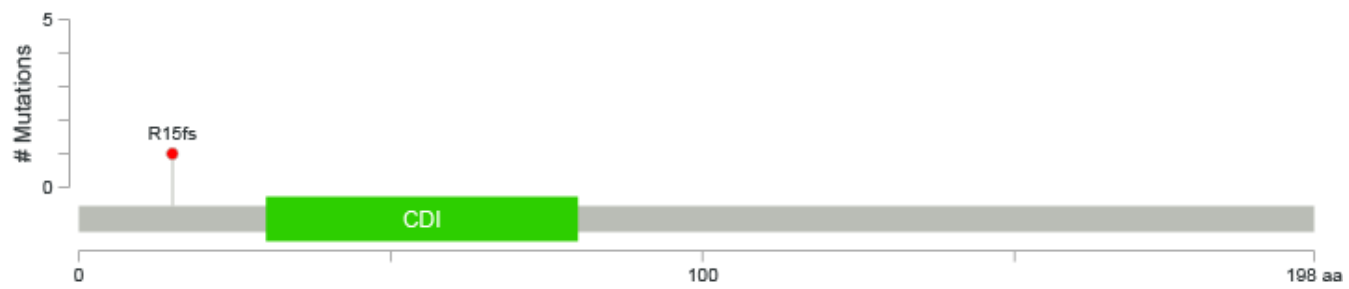**BJ. CDKN2A**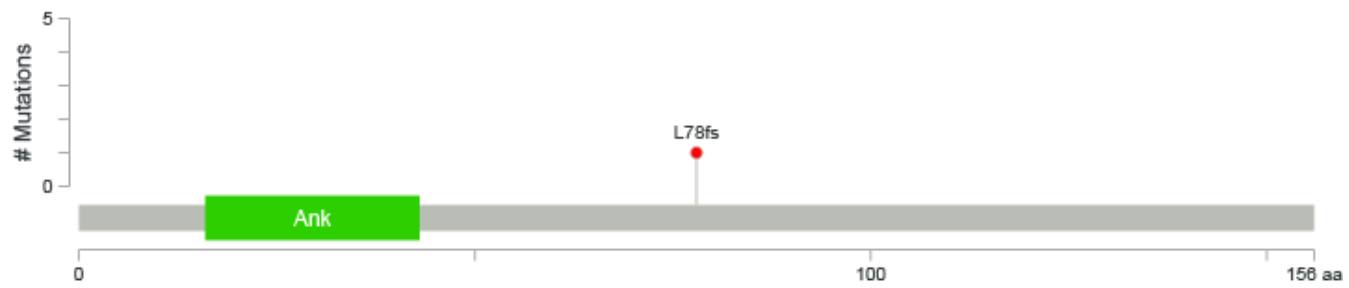**BK. CDKN2C**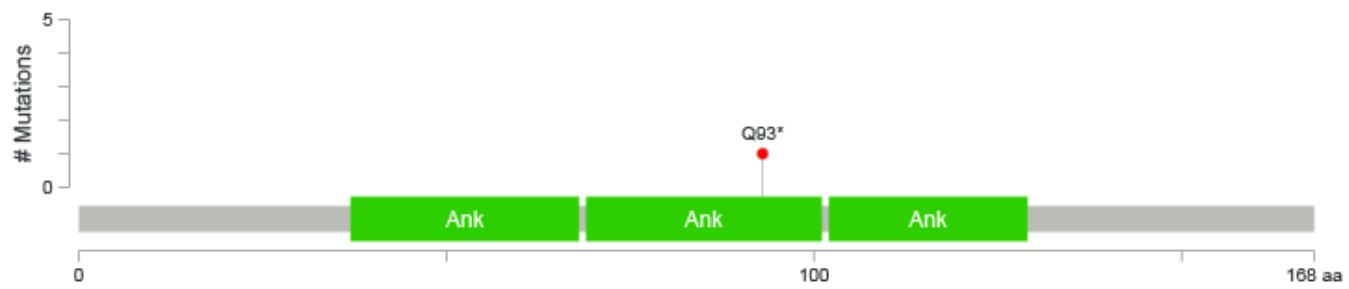**BL. ERBB2**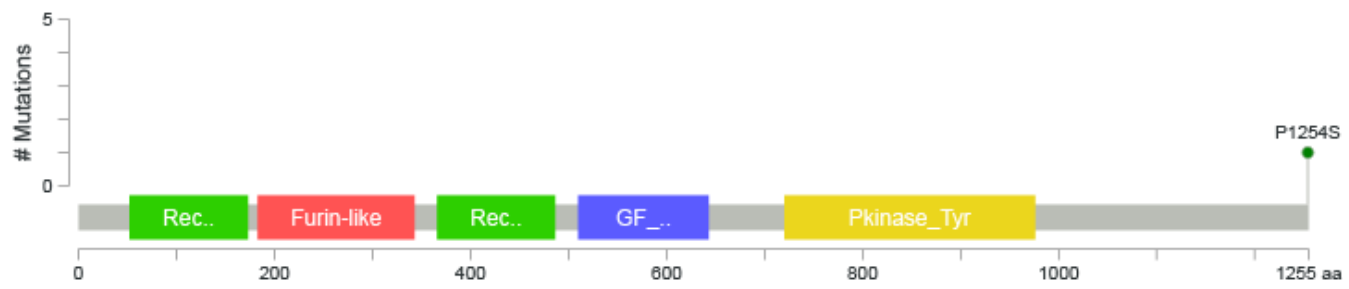**BM. PTCH1**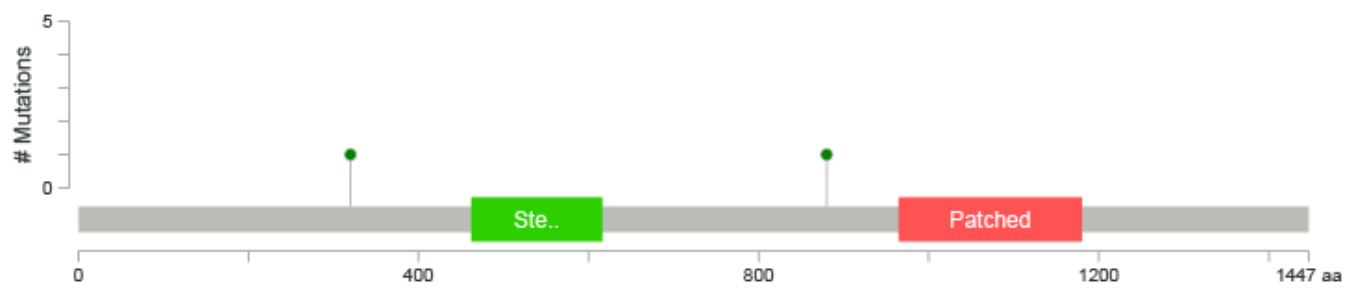

## BN. DAXX

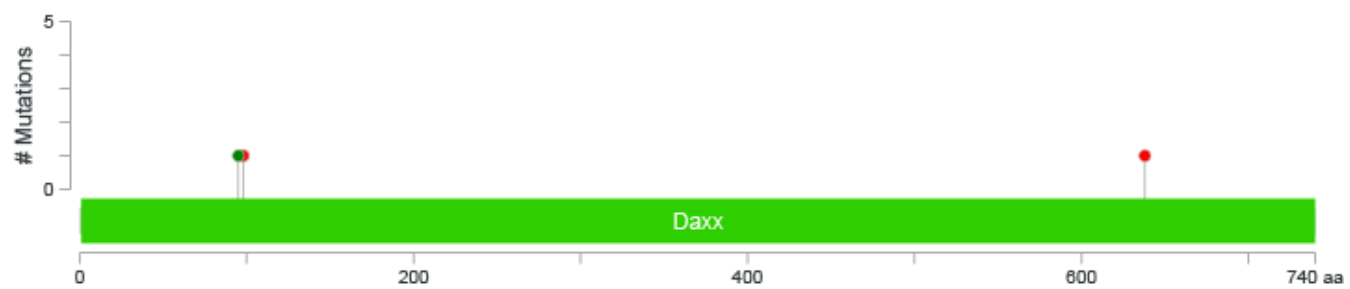**Color key**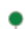

missense

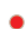

truncating

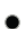

in-frame

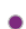

mixed

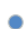

promoter

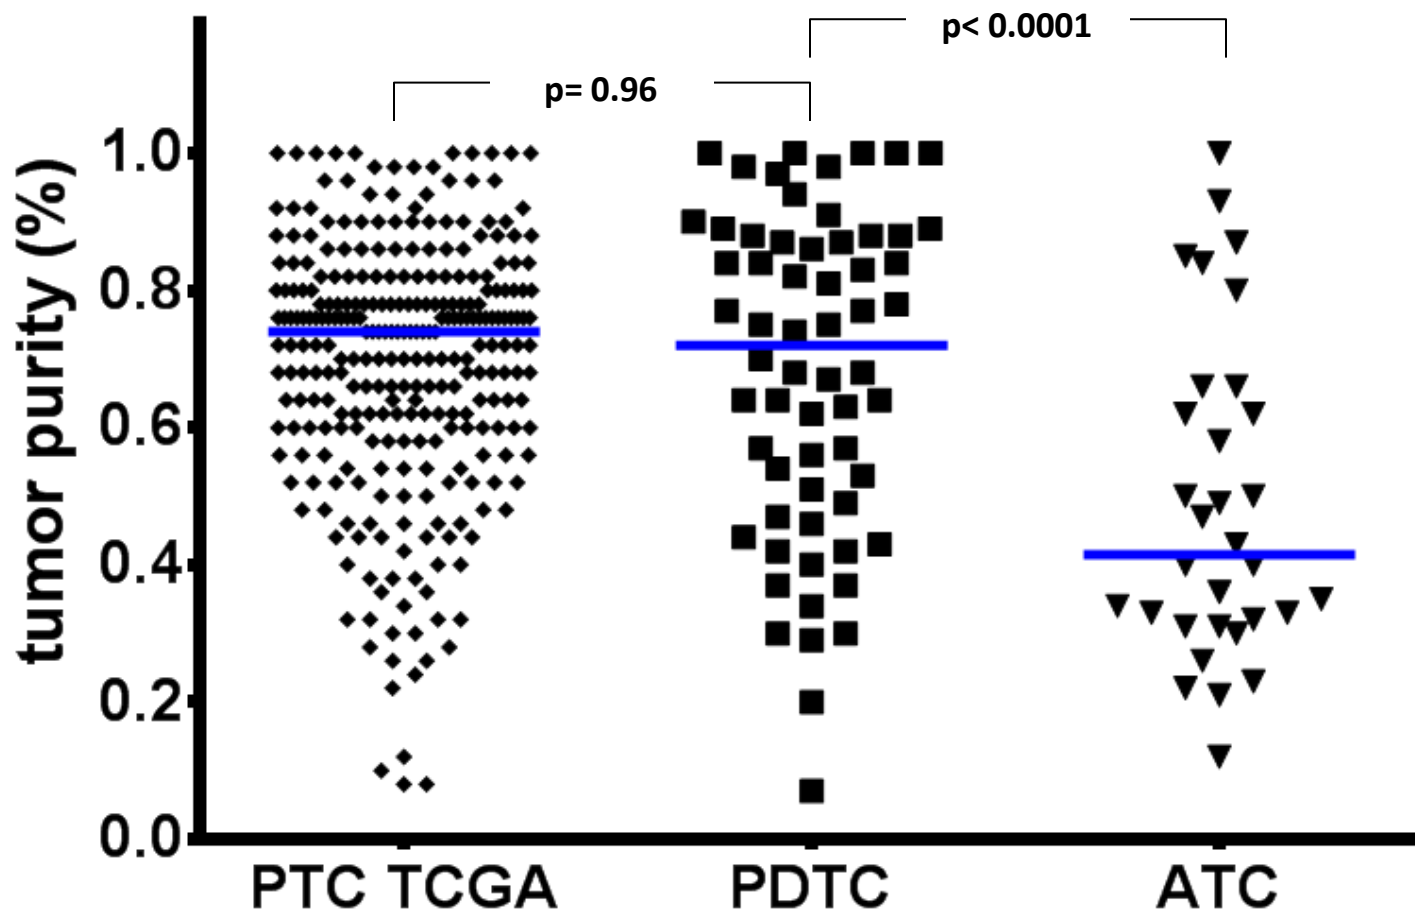

|                  | PTC TCGA | PDTC | ATC  |
|------------------|----------|------|------|
| Number of tumors | 286      | 62   | 32   |
| Median purity    | 0.74     | 0.72 | 0.42 |

chromosome 1p loss

## Copy number, array-CGH

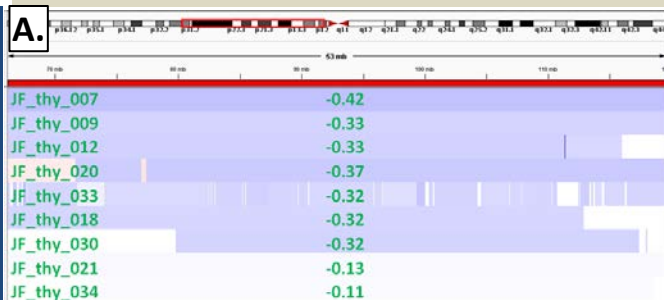

## Copy number, IMPACT

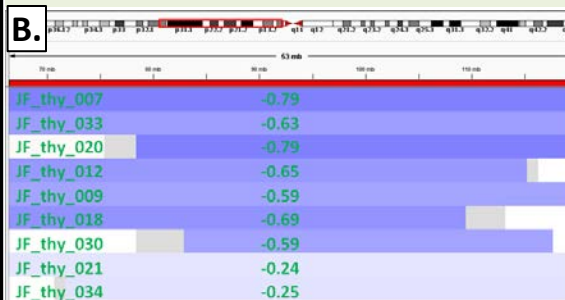

## Copy number, IMPACT, corrected

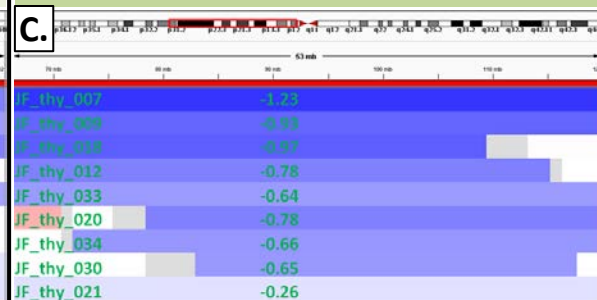

chromosome 20q gain

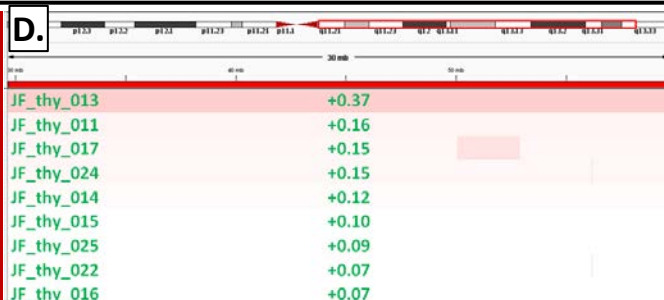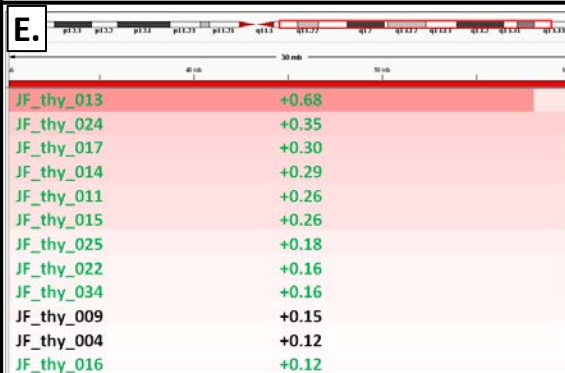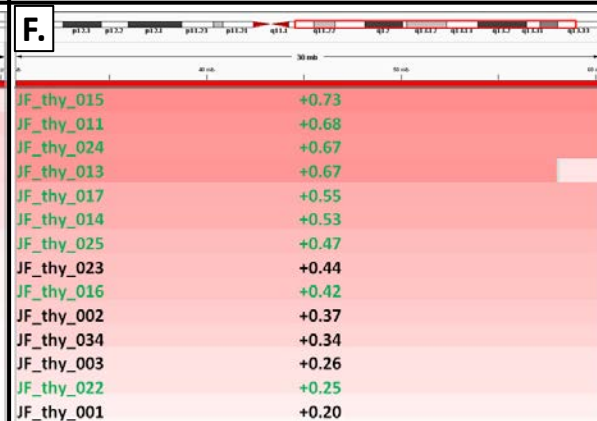

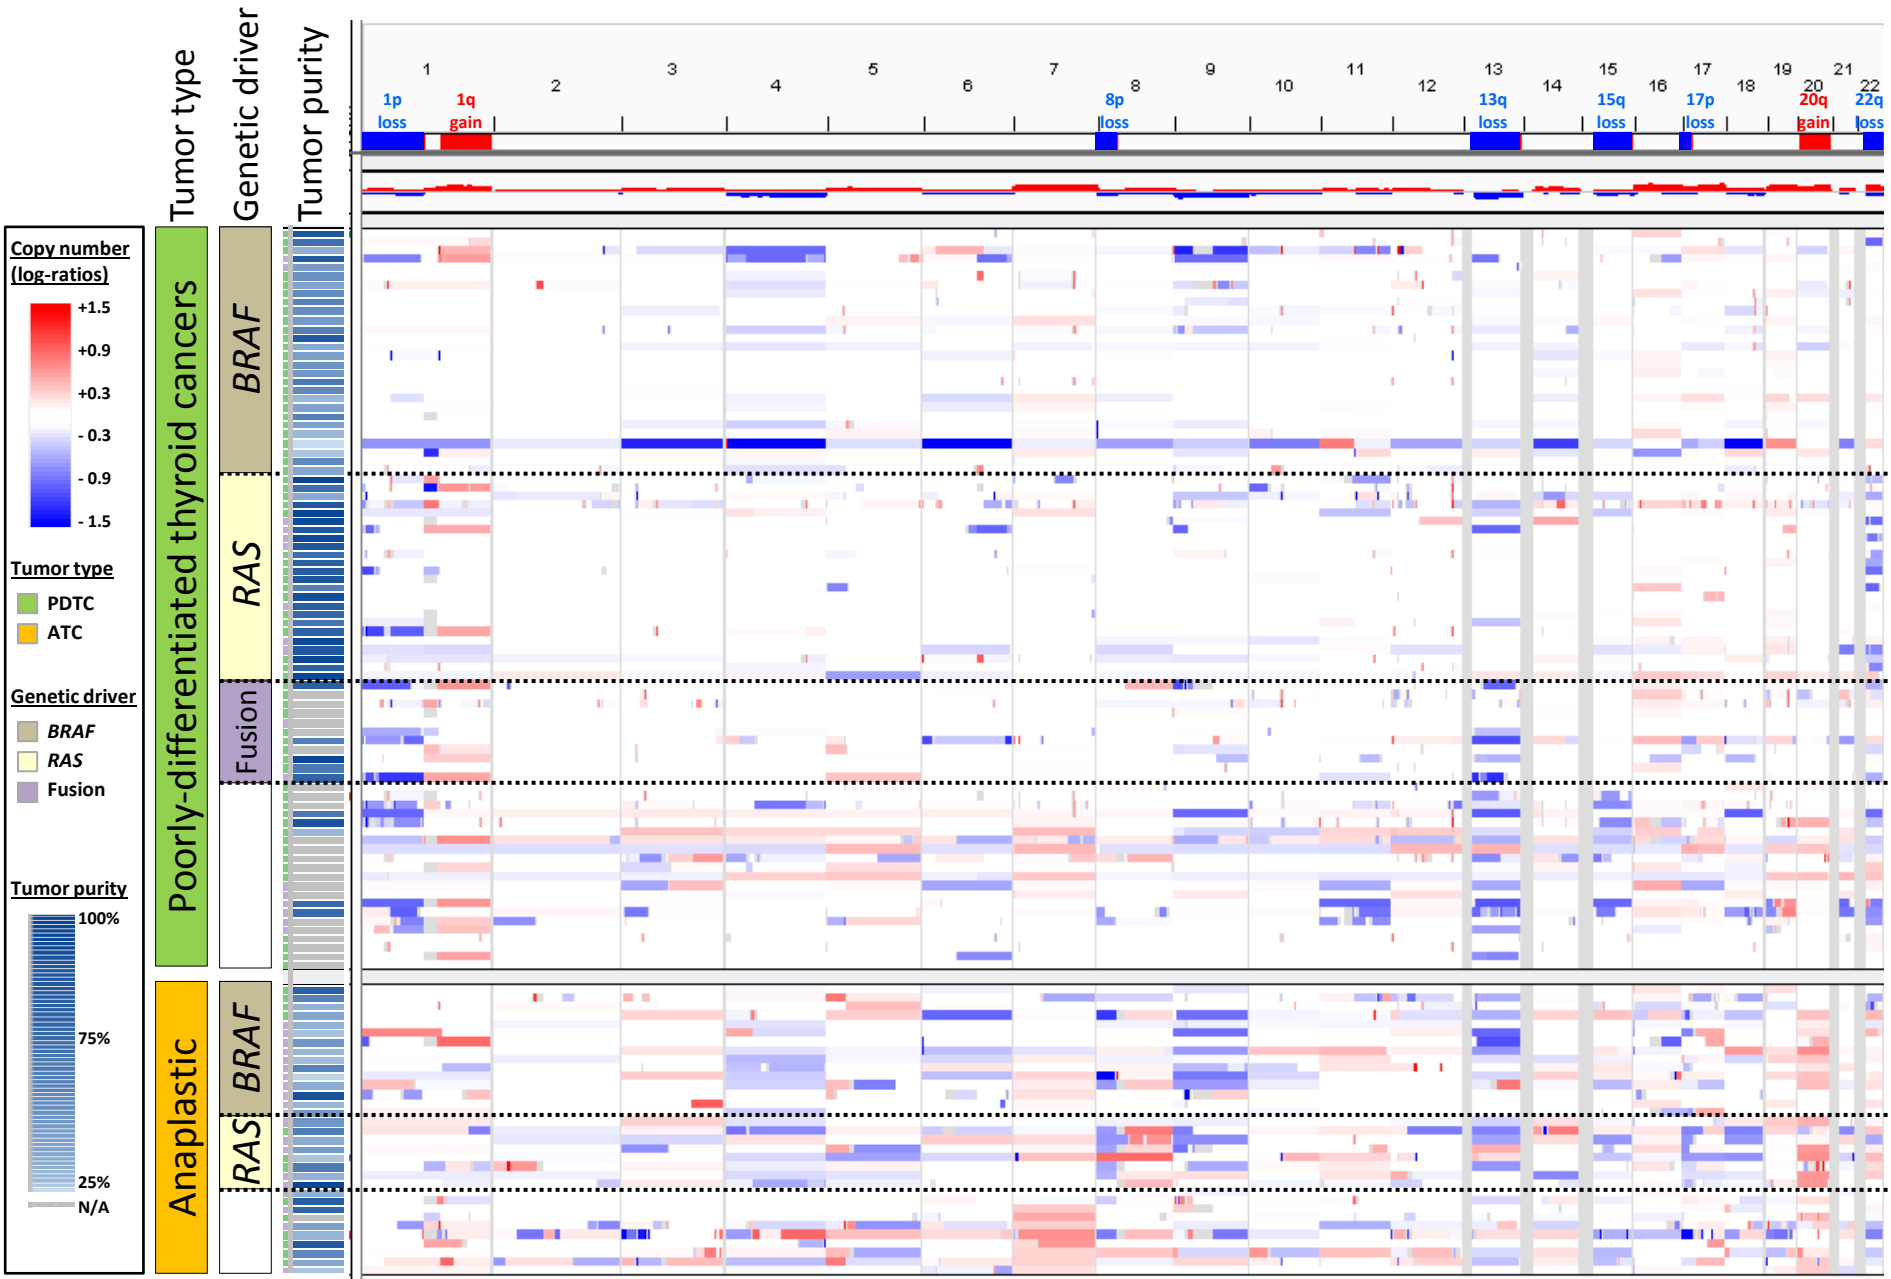



Suppl Fig S5

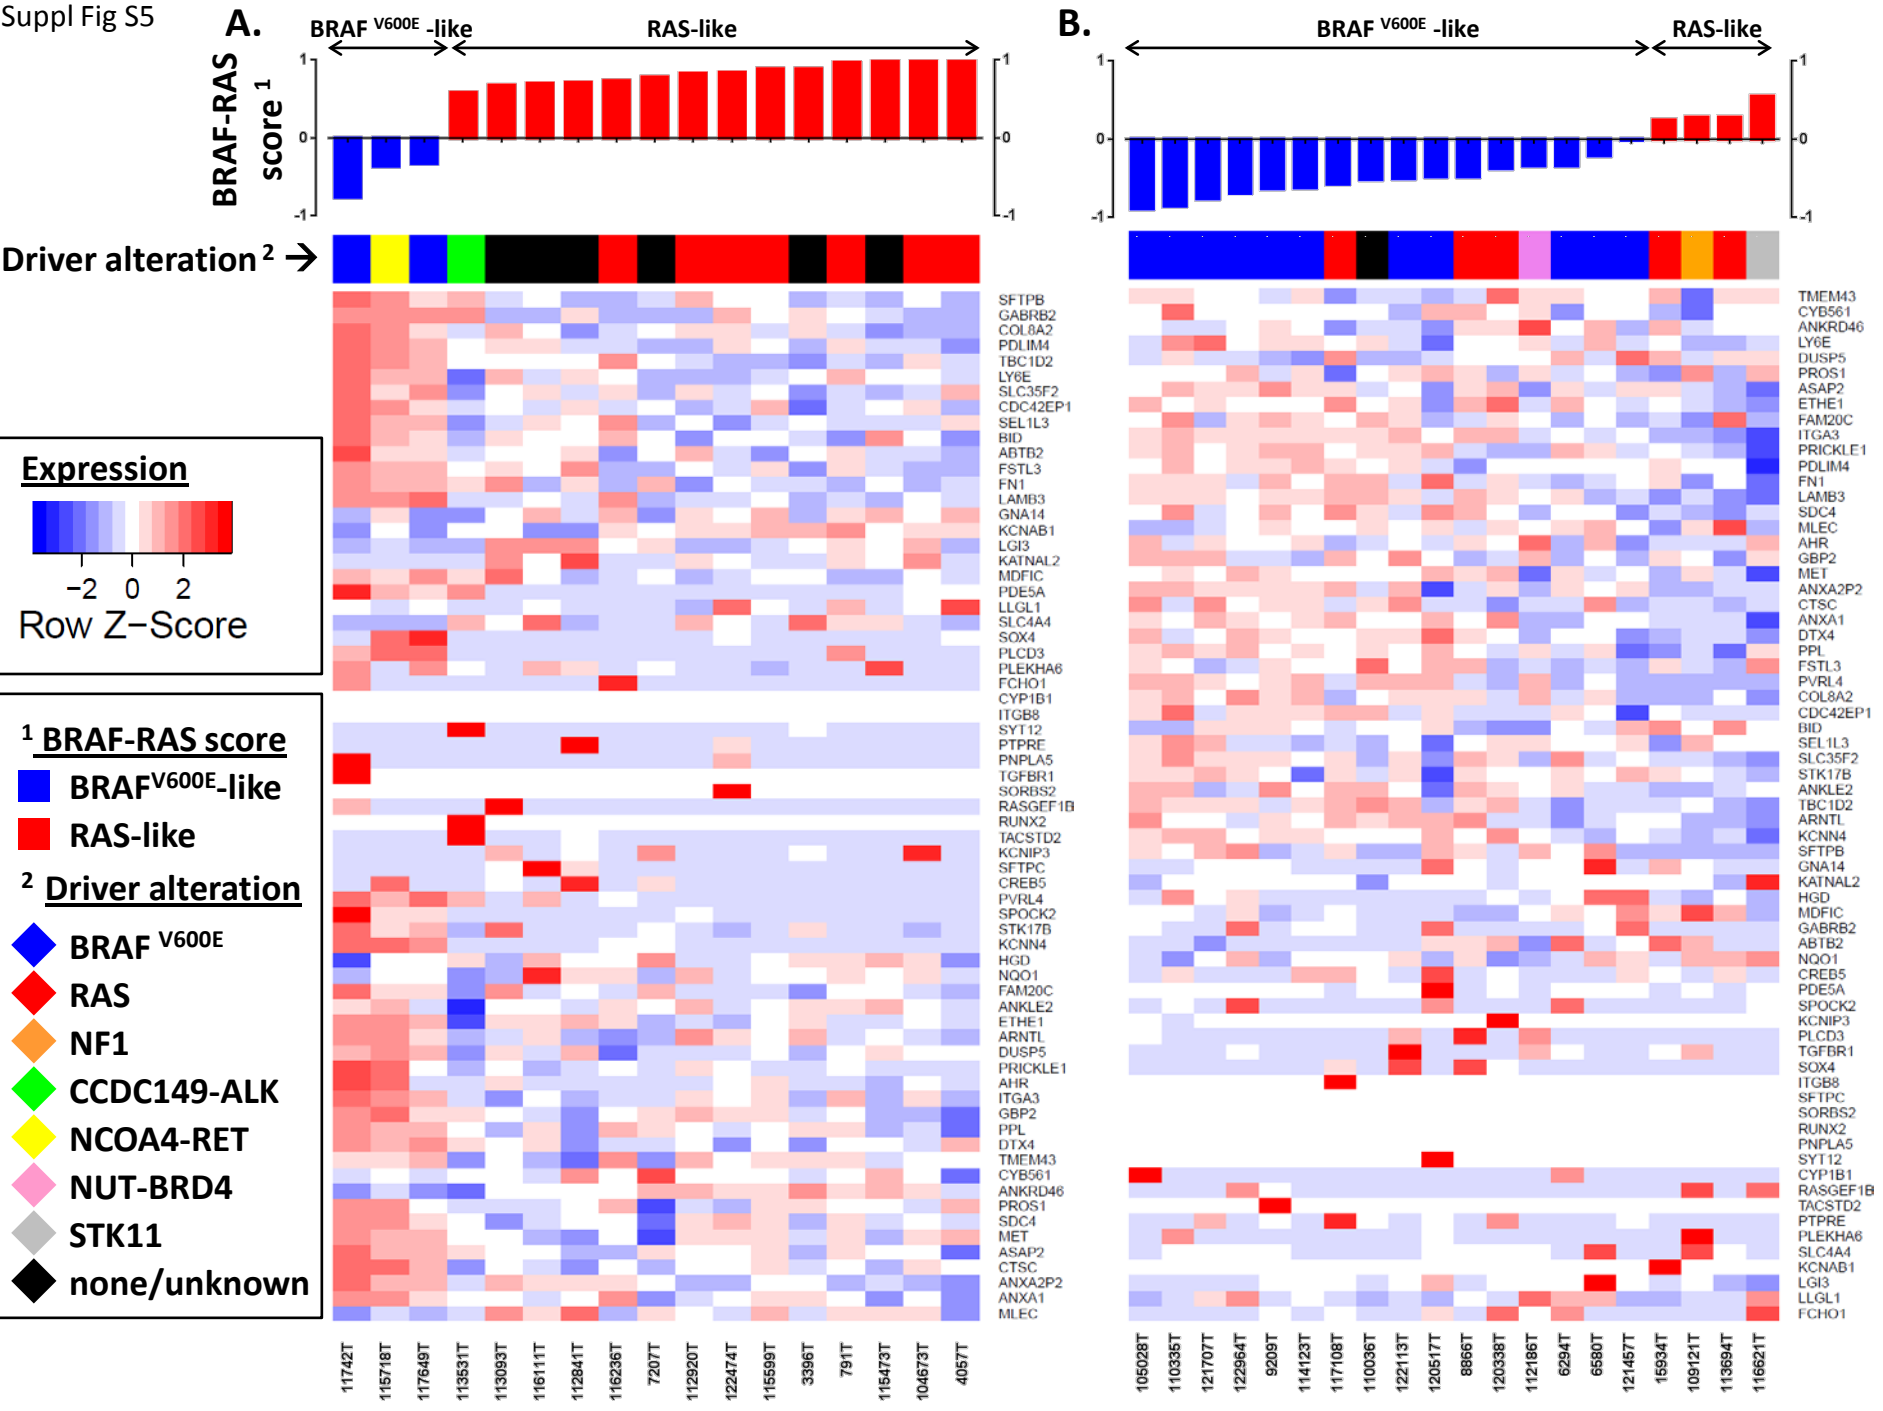

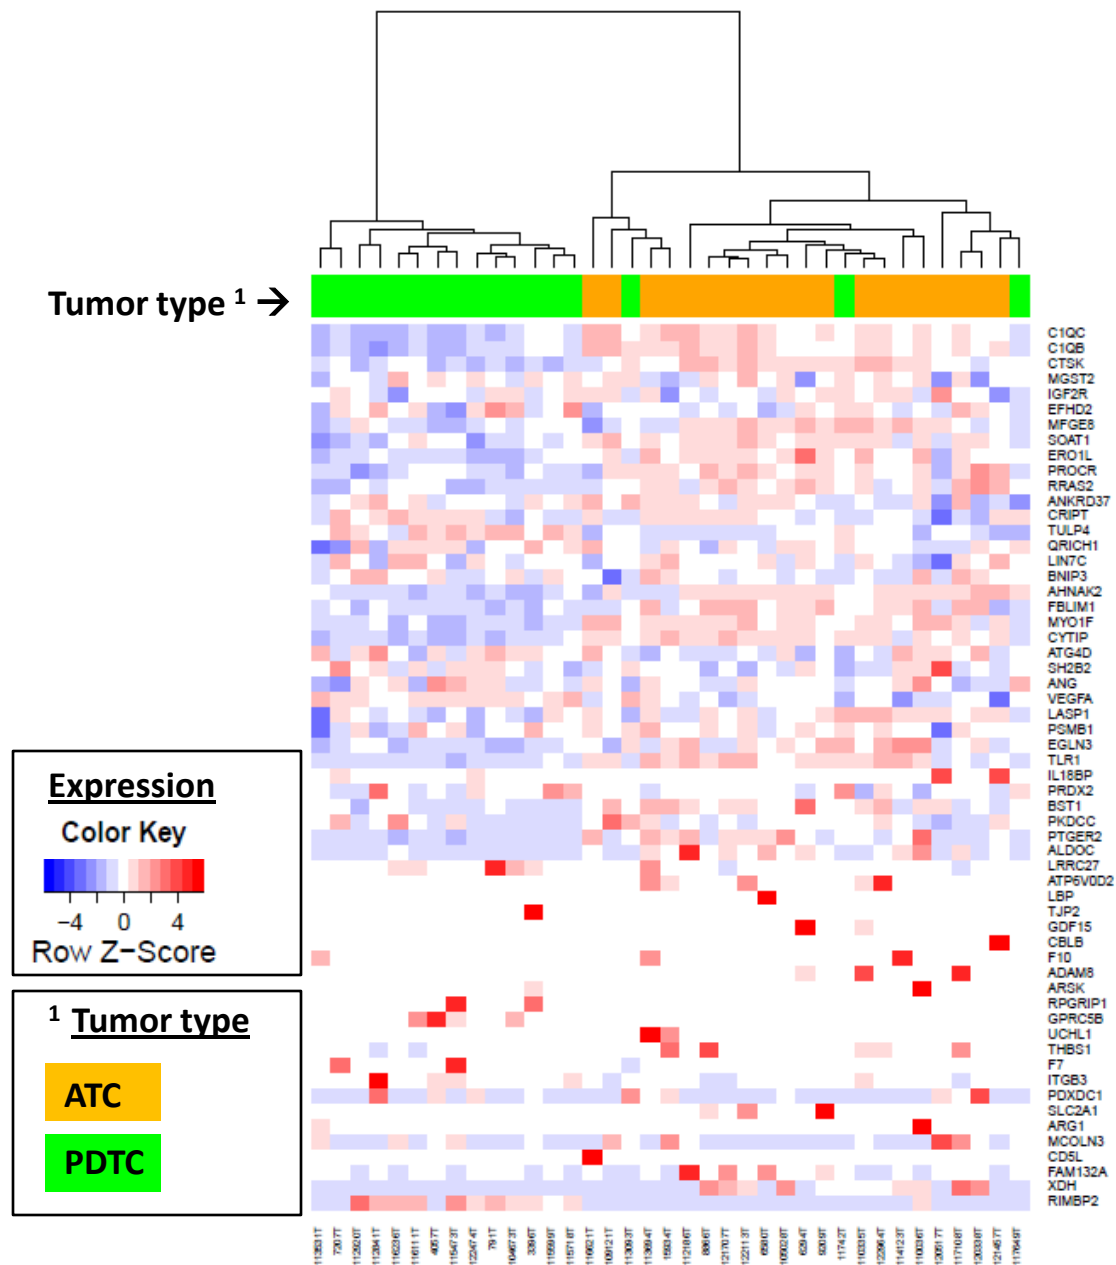

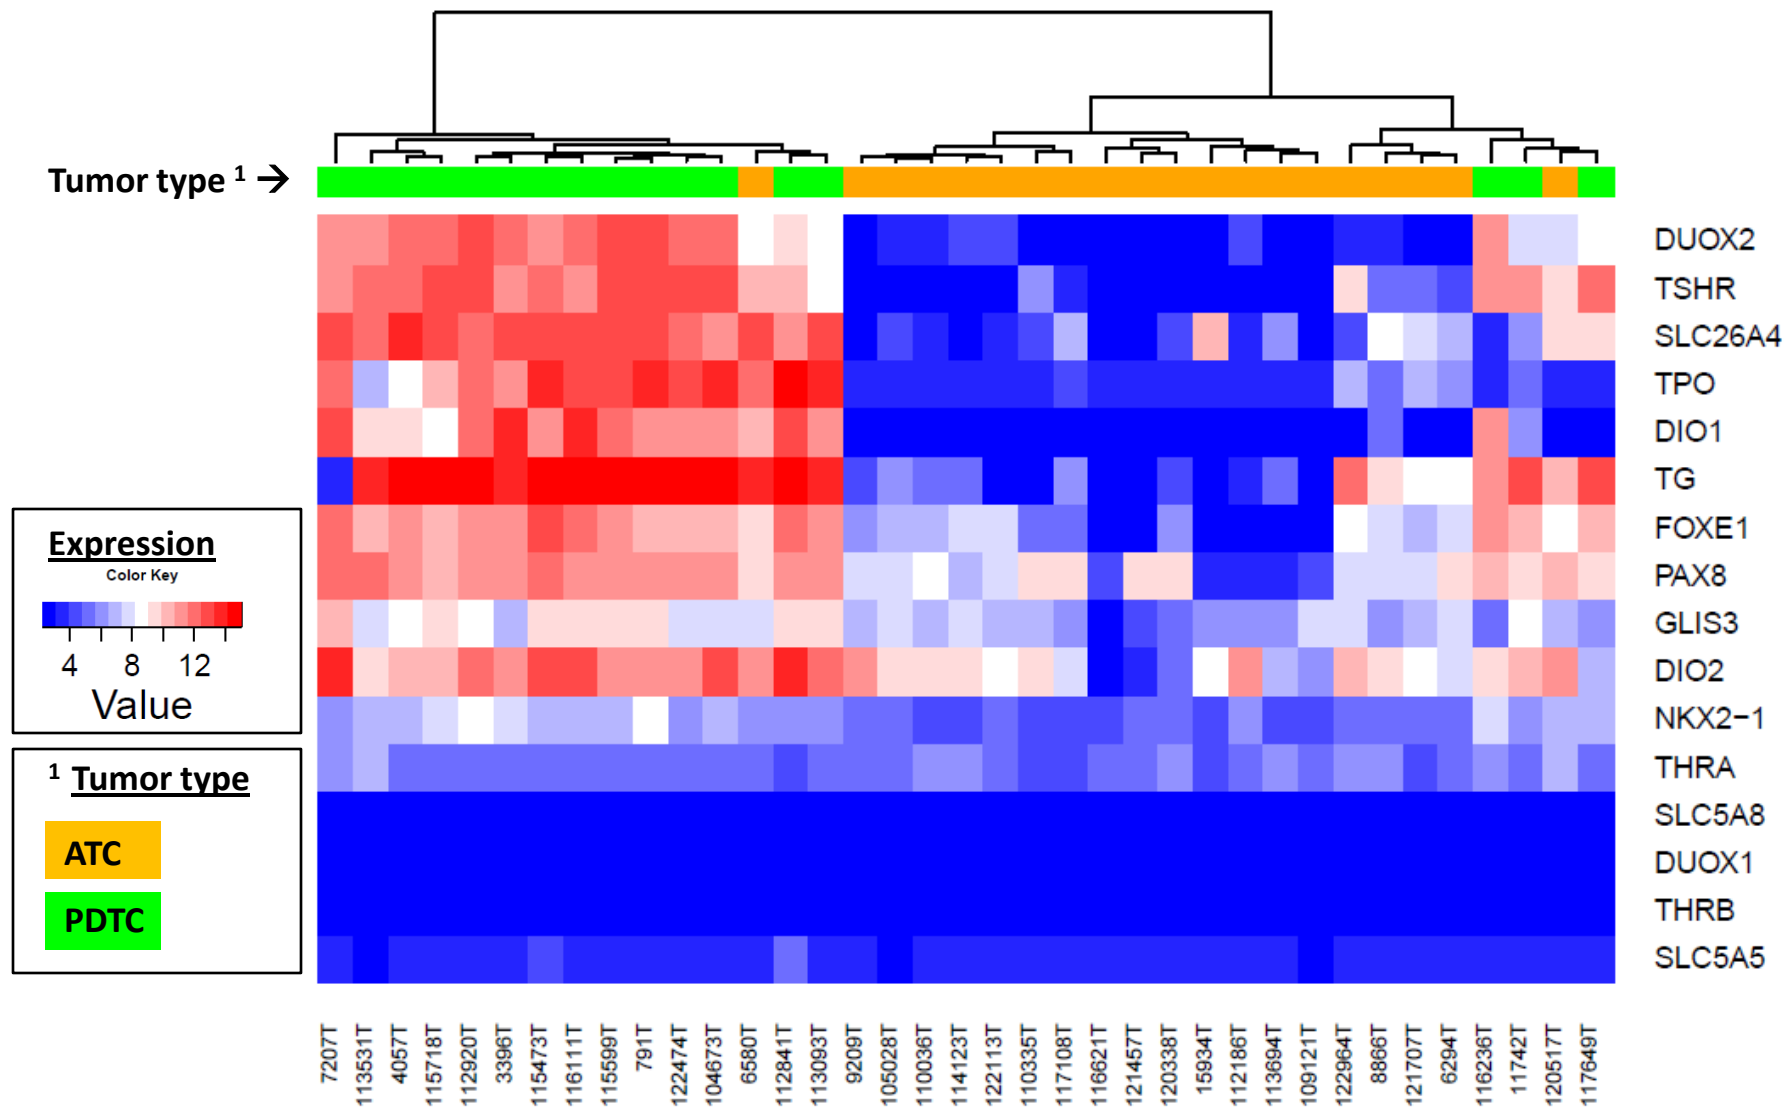

**Supplementary Table S2. Impact of mutation burden on clinicopathological features of advanced thyroid tumors.**

**A. Anaplastic thyroid cancers (ATC)**

| Total ATC = 28                  | Below<br>median(13) | Median(6) | Above median (9)     | p value |
|---------------------------------|---------------------|-----------|----------------------|---------|
| Age (y)                         | 67±13               | 67±9      | 64±8                 | 0.402   |
| Gender (%F)                     | 54%                 | 33%       | 67%                  | 0.483   |
| Tobacco (%yes)                  | 31%                 | 33%       | 25%                  | 1       |
| Tumor size                      | 5.8±2.4             | 7.2±2     | 5.6±1                | 0.051   |
| Pathology staging               |                     |           |                      |         |
| T2                              | 1                   | 0         | 0                    | 0.743   |
| T3                              | 0                   | 0         | 2                    |         |
| T4                              | 9                   | 4         | 4                    |         |
| T4b                             | 1                   | 1         | 1                    |         |
| N0                              | 1                   | 0         | 0                    | 0.566   |
| N1a                             | 0                   | 1         | 2                    |         |
| N1b                             | 6                   | 4         | 3                    |         |
| Nx                              | 4                   | 0         | 2                    |         |
| M0                              | 0                   | 0         | 0                    | 0.876   |
| M1                              | 5                   | 2         | 4                    |         |
| Mx                              | 7                   | 3         | 3                    |         |
| Mitotic activity                |                     |           |                      | 0.895   |
| Mild                            | 0                   | 0         | 1                    | 0.922   |
| Moderate                        | 1                   | 1         | 1                    |         |
| Marked                          | 6                   | 3         | 4                    |         |
| Necrosis                        |                     |           |                      | 0.922   |
| None                            | 2                   | 0         | 1                    | 0.089   |
| Present                         | 1                   | 0         | 1                    |         |
| Extensive                       | 5                   | 4         | 4                    |         |
| Vascular invasion               |                     |           |                      | 0.089   |
| No                              | 3                   | 0         | 0                    | 0.805   |
| Yes                             | 5                   | 5         | 6                    |         |
| Extrathyroidal extension        |                     |           |                      | 0.805   |
| No                              | 1                   | 0         | 1                    | 0.053   |
| Minimal                         | 3                   | 3         | 3                    |         |
| Gross                           | 6                   | 3         | 2                    |         |
| Overall survival (died)         | 54%                 | 100%      | 37.5%                | 0.053   |
| Overall survival time (days±SD) | 410±968             | 166±112   | 233±92               | 0.21    |
| Survival analysis: HR (95%CI)   |                     |           | HR: 0.76 (0.43-1.35) | 0.352   |

## B. Poorly differentiated thyroid cancers (PDTC)

| PDTC = 78                              | Below median<br>(26) | Median (24)      | Above median(28)           | p value          |
|----------------------------------------|----------------------|------------------|----------------------------|------------------|
| Age (y)                                | 47±15                | 58±15            | 64±15                      | <b>&lt;0.001</b> |
| Gender (%F)                            | 73%                  | 58%              | 54%                        | 0.314            |
| Family history TC(%yes)                | 12%                  | 0%               | 7%                         | 0.452            |
| <b>Tumor size</b>                      |                      |                  |                            |                  |
| ≤ 4                                    | 64%                  | 57%              | 29%                        |                  |
| >4                                     | <b>36%</b>           | <b>43%</b>       | <b>71%</b>                 | <b>0.038</b>     |
| <b>Pathology staging</b>               |                      |                  |                            |                  |
| T1/T2                                  | 17%                  | 15%              | 4%                         |                  |
| T3/T4                                  | 83%                  | 85%              | 96%                        | 0.405            |
| Nx/N0                                  | 54%                  | 45%              | 52%                        |                  |
| N1a/N1b                                | 46%                  | 55%              | 48%                        | 0.822            |
| M0                                     | 73%                  | 54%              | 32%                        |                  |
| M1                                     | <b>8%</b>            | <b>29%</b>       | <b>57%</b>                 |                  |
| Mx                                     | 19%                  | 17%              | 11%                        | <b>0.002</b>     |
| <b>RAI</b>                             |                      |                  |                            | 0.874            |
| No                                     | 19%                  | 29%              | 18%                        |                  |
| Yes                                    | 73%                  | 63%              | 75%                        |                  |
| <b>RAI Uptake</b>                      |                      |                  |                            |                  |
| No uptake                              | 8%                   | 4%               | 0%                         |                  |
| Thyroid bed                            | 38%                  | 29%              | 21%                        |                  |
| Outside thyroid bed                    | 27%                  | 29%              | 50%                        | 0.391            |
| <b>Overall survival (died)</b>         | <b>19%</b>           | <b>25%</b>       | <b>46%</b>                 | <b>0.07</b>      |
| <b>Overall survival time (days±SD)</b> | <b>2242±1332</b>     | <b>2181±1406</b> | <b>1469±1158</b>           | <b>0.05</b>      |
| <b>Survival analysis: HR (95%CI)</b>   |                      |                  | <b>HR:2.03 (1.19-3.47)</b> | <b>0.01</b>      |
| <b>Log rank</b>                        |                      |                  |                            | <b>0.014</b>     |

### Kaplan-Meier. Mutation burden in PDTCs

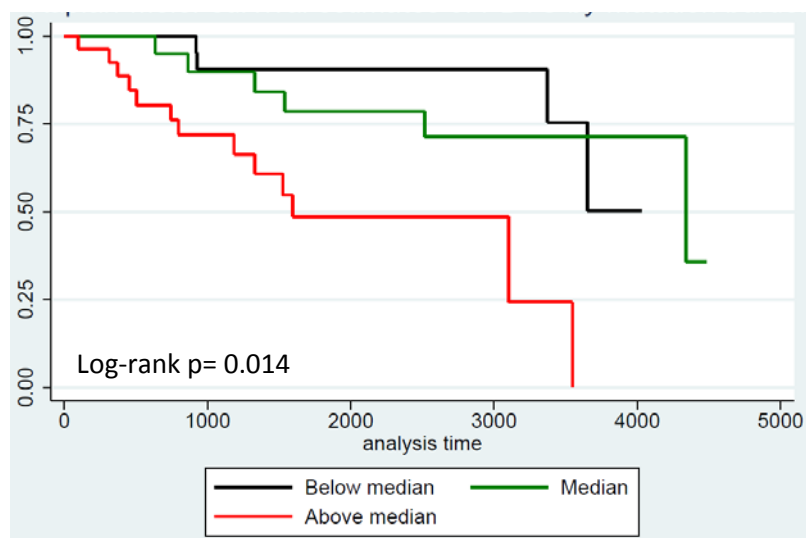

Supplementary Table S3. Contingency analysis of the main genetic alterations in PDTCs and ATCs.

| Gene status / Tumor type                 | Number of tumors |     | Fisher's exact test p-value <sup>3</sup> |
|------------------------------------------|------------------|-----|------------------------------------------|
|                                          | PDTC             | ATC |                                          |
| <i>BRAF</i> wildtype                     | 56               | 18  | 0.29                                     |
| <i>BRAF</i> mutant                       | 28               | 15  |                                          |
| <i>NRAS</i> wildtype                     | 66               | 27  | 0.80                                     |
| <i>NRAS</i> mutant                       | 18               | 6   |                                          |
| <i>HRAS</i> wildtype                     | 80               | 31  | 1                                        |
| <i>HRAS</i> mutant                       | 4                | 2   |                                          |
| <i>KRAS</i> wildtype                     | 82               | 33  | 1                                        |
| <i>KRAS</i> mutant                       | 2                | 0   |                                          |
| <i>RAS</i> wildtype <sup>1</sup>         | 60               | 25  | 0.82                                     |
| <i>RAS</i> mutant <sup>1</sup>           | 24               | 8   |                                          |
| <i>NF1</i> wildtype                      | 84               | 30  | <b>0.02</b>                              |
| <i>NF1</i> mutant                        | 0                | 3   |                                          |
| <i>TSHR</i> wildtype                     | 82               | 31  | 0.32                                     |
| <i>TSHR</i> mutant                       | 2                | 2   |                                          |
| <i>STK11</i> wildtype                    | 83               | 31  | 0.19                                     |
| <i>STK11</i> mutant                      | 1                | 2   |                                          |
| <i>EIF1AX</i> wildtype                   | 75               | 30  | 1                                        |
| <i>EIF1AX</i> mutant                     | 9                | 3   |                                          |
| <i>PIK3CA</i> wildtype                   | 82               | 27  | <b>0.006</b>                             |
| <i>PIK3CA</i> mutant                     | 2                | 6   |                                          |
| <i>PTEN</i> wildtype                     | 81               | 28  | <b>0.04</b>                              |
| <i>PTEN</i> mutant                       | 3                | 5   |                                          |
| <i>RET</i> wildtype                      | 79               | 33  | 0.32                                     |
| <i>RET</i> rearranged                    | 5                | 0   |                                          |
| PAX8-PPARG wildtype                      | 81               | 33  | 0.56                                     |
| PAX8-PPARG rearranged                    | 3                | 0   |                                          |
| <i>ALK</i> wildtype                      | 81               | 33  | 0.56                                     |
| <i>ALK</i> rearranged                    | 3                | 0   |                                          |
| Thyroid fusions not present <sup>2</sup> | 73               | 33  | <b>0.03</b>                              |
| Thyroid fusions present <sup>2</sup>     | 11               | 0   |                                          |
| NUT-BRD4 wildtype                        | 84               | 32  | 0.28                                     |
| NUT-BRD4 rearranged                      | 0                | 1   |                                          |
| <i>TERT</i> promoter wildtype            | 50               | 9   | <b>0.002</b>                             |
| <i>TERT</i> promoter mutant              | 34               | 24  |                                          |
| <i>TP53</i> wildtype                     | 77               | 9   | <b>&lt; 0.0001</b>                       |
| <i>TP53</i> mutant                       | 7                | 24  |                                          |

**Supplementary Table S3.** (continued)

| Gene status / Tumor type  | Number of tumors |     | Fisher's exact test p-value <sup>3</sup> |
|---------------------------|------------------|-----|------------------------------------------|
|                           | PDTC             | ATC |                                          |
| <i>ATM</i> wildtype       | 78               | 30  | 0.71                                     |
| <i>ATM</i> mutant         | 6                | 3   |                                          |
| <i>RB1</i> wildtype       | 83               | 30  | 0.07                                     |
| <i>RB1</i> mutant         | 1                | 3   |                                          |
| <i>NF2</i> wildtype       | 84               | 31  | 0.08                                     |
| <i>NF2</i> mutant         | 0                | 2   |                                          |
| <i>MEN1</i> wildtype      | 83               | 32  | 0.49                                     |
| <i>MEN1</i> mutant        | 1                | 1   |                                          |
| PI3K/AKT pathway wildtype | 75               | 20  | <b>0.001</b>                             |
| PI3K/AKT pathway mutant   | 9                | 13  |                                          |
| SWI/SNF complex wildtype  | 79               | 21  | <b>0.0001</b>                            |
| SWI/SNF complex mutant    | 5                | 12  |                                          |
| HMTs group wildtype       | 78               | 25  | <b>0.02</b>                              |
| HMTs group mutant         | 6                | 8   |                                          |
| MMR pathway wildtype      | 82               | 29  | 0.05                                     |
| MMR pathway mutant        | 2                | 4   |                                          |

<sup>1</sup> "RAS" category includes NRAS, HRAS and KRAS.

<sup>2</sup> "Thyroid fusions" include rearrangements of genes previously reported in thyroid tumors.

<sup>3</sup> Significant p-values are highlighted in yellow; marginally significant are highlighted in grey.

Abbreviations: HMT =histone methyltransferase, MMR= mismatch excision repair.

**Supplementary Table S5. Clinicopathological characteristics of ATCs and PDCs according to *BRAF* and *RAS* mutation status and gene fusions.**

**A. Anaplastic thyroid cancers (ATC)**

| <b>Total ATC = 33</b>                  | <b>BRAF wt (18)</b> | <b>BRAF + (15)</b> | <b>p value</b> |
|----------------------------------------|---------------------|--------------------|----------------|
| <b>Age (y)</b>                         | 62±12               | 69±7               | <b>0.055</b>   |
| <b>Gender (%F)</b>                     | 44%                 | 67%                | 0.202          |
| <b>Tobacco (%yes)</b>                  | 35%                 | 20%                | 0.337          |
| <b>Tumor size</b>                      | 7±2                 | 5.1±2              | <b>0.012</b>   |
| <b>Pathology staging</b>               |                     |                    |                |
| T2                                     | 0                   | 1                  | 0.518          |
| T3                                     | 1                   | 1                  |                |
| T4                                     | 11                  | 10                 |                |
| T4b                                    | 3                   | 0                  |                |
| N0                                     | 1                   | 0                  | 0.974          |
| N1a                                    | 2                   | 1                  |                |
| N1b                                    | 7                   | 8                  |                |
| Nx                                     | 3                   | 3                  |                |
| M0                                     | 0                   | 0                  | 0.296          |
| M1                                     | 9                   | 6                  |                |
| Mx                                     | 5                   | 8                  |                |
| <b>Mitotic activity</b>                |                     |                    | <b>0.232</b>   |
| Mild                                   | 0                   | 1                  | 0.177          |
| Moderate                               | 1                   | 2                  |                |
| Marked                                 | 10                  | 4                  |                |
| <b>Necrosis</b>                        |                     |                    | <b>0.177</b>   |
| None                                   | 3                   | 0                  | 0.566          |
| Present                                | 0                   | 2                  |                |
| Extensive                              | 8                   | 6                  |                |
| <b>Vascular invasion</b>               |                     |                    | <b>0.566</b>   |
| No                                     | 1                   | 2                  | 0.840          |
| Yes                                    | 10                  | 7                  |                |
| <b>Extrathyroidal extension</b>        |                     |                    | <b>0.840</b>   |
| No                                     | 1                   | 1                  | 0.615          |
| Minimal                                | 4                   | 6                  |                |
| Gross                                  | 6                   | 6                  |                |
| <b>Positive LN (mean num ± SD)</b>     | 4±3.5               | 4.75±3.4           | <b>0.615</b>   |
| <b>Largest LN (mean ± SD, cm)</b>      | 1.6±1.2             | 2.4±1.2            | <b>0.356</b>   |
| <b>Extranodal extension</b>            | 5/6                 | 3/5                | <b>0.545</b>   |
| <b>Overall survival (died)</b>         | 56%                 | 73%                | <b>0.458</b>   |
| <b>Overall survival time (days±SD)</b> | 387±866             | 165±125            | <b>0.334</b>   |
| <b>Survival analysis: HR (95%CI)</b>   | HR:1.3 (0.54-3.27)  |                    | <b>0.528</b>   |



| Total ATC = 33                  | RAS wt (25) | RAS + (8)            | p value |
|---------------------------------|-------------|----------------------|---------|
| Age (y)                         | 64±10       | 67±12                | 0.558   |
| Gender (%F)                     | 60%         | 37.5%                | 0.266   |
| Tobacco (%yes)                  | 25%         | 37.5%                | 0.496   |
| Tumor size                      | 5.8±2       | 7.4±2                | 0.07    |
| <b>Pathology staging</b>        |             |                      |         |
| T2                              | 1           | 0                    |         |
| T3                              | 2           | 0                    |         |
| T4                              | 14          | 7                    |         |
| T4b                             | 2           | 1                    | 0.464   |
| N0                              | 1           | 0                    |         |
| N1a                             | 2           | 1                    |         |
| N1b                             | 10          | 5                    |         |
| Nx                              | 5           | 1                    | 0.730   |
| M0                              | 0           | 0                    |         |
| M1                              | 9           | 6                    |         |
| Mx                              | 11          | 2                    | 0.210   |
| <b>Mitotic activity</b>         |             |                      | 1       |
| Mild                            | 1           | 0                    |         |
| Moderate                        | 2           | 1                    |         |
| Marked                          | 10          | 4                    |         |
| <b>Necrosis</b>                 |             |                      | 0.210   |
| None                            | 1           | 2                    |         |
| Present                         | 2           | 0                    |         |
| Extensive                       | 11          | 3                    |         |
| <b>Vascular invasion</b>        |             |                      | 1       |
| No                              | 2           | 1                    |         |
| Yes                             | 13          | 4                    |         |
| <b>Extrathyroidal extension</b> |             |                      | 0.441   |
| No                              | 2           | 0                    |         |
| Minimal                         | 9           | 1                    |         |
| Gross                           | 8           | 4                    |         |
| Positive LN (mean num ± SD)     | 4.2±3       | 4.6±4                | 0.818   |
| Largest LN (mean ± SD, cm)      | 2±1.3       | 1.7±1                | 0.581   |
| Extranodal extension            | 4/6         | 4/5                  | 1       |
| Overall survival (died)         | 57%         | 87.5%                | 0.203   |
| Overall survival time (days±SD) | 318±727     | 170±118              | 0.575   |
| Survival analysis: HR (95%CI)   |             | HR: 1.76 (0.68-4.56) | 0.247   |

| Total ATC = 33                         | BRAF/RAS/Fusion –<br>(9) | BRAF/RAS/Fusion + (24) | p value |
|----------------------------------------|--------------------------|------------------------|---------|
| Age (y)                                | 60±8                     | 67±11                  | 0.115   |
| Gender (%F)                            | 44%                      | 58%                    | 0.475   |
| Tobacco (%yes)                         | 37.5%                    | 25%                    | 0.496   |
| Tumor size                             | 7±1.6                    | 6±2.2                  | 0.237   |
| <b>Pathology staging</b>               |                          |                        |         |
| T2                                     | 0                        | 1                      |         |
| T3                                     | 1                        | 1                      |         |
| T4                                     | 3                        | 18                     |         |
| T4b                                    | 2                        | 1                      | 0.077   |
| N0                                     | 0                        | 1                      |         |
| N1a                                    | 1                        | 2                      |         |
| N1b                                    | 2                        | 13                     |         |
| Nx                                     | 2                        | 4                      | 0.324   |
| M0                                     | 0                        | 0                      |         |
| M1                                     | 3                        | 12                     |         |
| Mx                                     | 2                        | 11                     | 0.024   |
| <b>Mitotic activity</b>                |                          |                        | 0.650   |
| Mild                                   | 0                        | 1                      |         |
| Moderate                               | 0                        | 3                      |         |
| Marked                                 | 5                        | 9                      |         |
| <b>Necrosis</b>                        |                          |                        | 1       |
| None                                   | 1                        | 2                      |         |
| Present                                | 0                        | 2                      |         |
| Extensive                              | 4                        | 10                     |         |
| <b>Vascular invasion</b>               |                          |                        | 0.539   |
| No                                     | 0                        | 3                      |         |
| Yes                                    | 5                        | 12                     |         |
| <b>Extrathyroidal extension</b>        |                          |                        | 0.221   |
| No                                     | 1                        | 1                      |         |
| Minimal                                | 3                        | 7                      |         |
| Gross                                  | 1                        | 11                     |         |
| <b>Positive LN (mean num ± SD)</b>     | 4±2.6                    | 4.4±3.6                | 0.874   |
| <b>Largest LN (mean ± SD, cm)</b>      | 1.5±2                    | 2±1                    | 0.675   |
| <b>Extranodal extension</b>            | 1/1                      | 7/10                   | 1       |
| <b>Overall survival (died)</b>         | 29%                      | 75%                    | 0.024   |
| <b>Overall survival time (days±SD)</b> | 175±82                   | 310±713                | 0.624   |
| <b>Survival analysis : HR (95%CI)</b>  |                          | HR:2.1 (0.48-9.37)     | 0.323   |

## B. Poorly differentiated thyroid cancers (PDTC)

| Total PDTC = 84                        | BRAF wt (56) | BRAF + (28) | p value                     |
|----------------------------------------|--------------|-------------|-----------------------------|
| Age (y)                                | 58±16        | 53±18       | 0.179                       |
| Gender (%F)                            | 50%          | 82%         | <b>0.004</b>                |
| Family history TC(%yes)                | 9%           | 4%          | 0.686                       |
| <b>Tumor size</b>                      |              |             |                             |
| ≤ 4                                    | 40%          | 70%         |                             |
| >4                                     | 60%          | 30%         | <b>0.01</b>                 |
| <b>Pathology staging</b>               |              |             |                             |
| T1/T2                                  | 11%          | 15%         |                             |
| T3/T4                                  | 89%          | 85%         | 0.720                       |
| Nx/N0                                  | 61%          | 37%         |                             |
| N1a/N1b                                | <b>39%</b>   | <b>63%</b>  | <b>0.049</b>                |
| M0                                     | <b>38%</b>   | <b>79%</b>  |                             |
| M1                                     | 45%          | 14%         |                             |
| Mx                                     | 17%          | 7%          | <b>0.009</b>                |
| <b>Encapsulation</b>                   |              |             | 0.121 (missing)             |
| No                                     | 29%          | 46%         |                             |
| Partial                                | 18%          | 18%         |                             |
| Complete                               | 34%          | 11%         |                             |
| <b>Capsular invasion</b>               |              |             | 0.039 (missing)             |
| No                                     | 9%           | 4%          |                             |
| Yes                                    | 38%          | 14%         |                             |
| <b>Vascular invasion</b>               |              |             | <b>0.001</b>                |
| No                                     | 11%          | 48%         |                             |
| Yes                                    | 89%          | 52%         |                             |
| <b>Extrathyroidal extension</b>        |              |             | <b>0.049</b>                |
| No                                     | 37%          | 15%         |                             |
| Minimal                                | 30%          | 26%         |                             |
| Gross                                  | <b>33%</b>   | <b>59%</b>  |                             |
| <b>Multicentricity</b>                 |              |             | 0.074                       |
| No                                     | 48%          | 43%         |                             |
| Yes                                    | 29%          | 50%         |                             |
| <b>Margins compromised</b>             |              |             | <b>0.001</b>                |
| No                                     | 54%          | 18%         |                             |
| Yes                                    | <b>30%</b>   | <b>71%</b>  |                             |
| <b>RAI</b>                             |              |             | 0.585                       |
| No                                     | 21%          | 18%         |                             |
| Yes                                    | 70%          | 79%         |                             |
| <b>RAI Uptake</b>                      |              |             | <b>0.005</b>                |
| No uptake                              | <b>2%</b>    | <b>11%</b>  |                             |
| Thyroid bed                            | 20%          | 46%         |                             |
| Outside thyroid bed                    | 46%          | 18%         |                             |
| <b>Overall survival (died)</b>         |              |             | 0.62                        |
| <b>Overall survival time (days±SD)</b> |              |             | 0.42                        |
| <b>Survival analysis: HR (95%CI)</b>   |              |             | HR:0.95 (0.43-2.13)<br>0.91 |

| Total PDTC = 84                 | RAS wt (60) | RAS + (24)           | p value |
|---------------------------------|-------------|----------------------|---------|
| Age (y)                         | 54±17       | 64±12                | 0.015   |
| Gender (%F)                     | 66%         | 46%                  | 0.077   |
| Family history TC(%yes)         | 5%          | 12.5%                | 0.52    |
| Tumor size                      |             |                      | 0.001   |
| ≤ 4                             | 63%         | 19%                  |         |
| >4                              | 37%         | 81%                  |         |
| Pathology staging               |             |                      |         |
| T1/T2                           | 16%         | 5%                   |         |
| T3/T4                           | 84%         | 95%                  | 0.259   |
| Nx/N0                           | 37%         | 86%                  |         |
| N1a/N1b                         | 63%         | 14%                  | <0.001  |
| M0                              | 62%         | 25%                  |         |
| M1                              | 22%         | 67%                  |         |
| Mx                              | 16%         | 8                    | 0.003   |
| Encapsulation                   |             |                      | 0.003   |
| No                              | 38%         | 25%                  |         |
| Partial                         | 20%         | 13%                  |         |
| Complete                        | 15%         | 54%                  |         |
| Capsular invasion               |             |                      | 0.024   |
| No                              | 7%          | 8%                   |         |
| Yes                             | 22%         | 50%                  |         |
| Vascular invasion               |             |                      | 0.001   |
| No                              | 35%         | 0%                   |         |
| Yes                             | 65%         | 100%                 |         |
| Extrathyroidal extension        |             |                      | 0.220   |
| No                              | 22%         | 43%                  |         |
| Minimal                         | 33%         | 19%                  |         |
| Gross                           | 45%         | 38%                  |         |
| Multicentricity                 |             |                      | 0.949   |
| No                              | 45%         | 50%                  |         |
| Yes                             | 37%         | 33%                  |         |
| Margins compromised             |             |                      | 0.137   |
| No                              | 35%         | 58%                  |         |
| Yes                             | 50%         | 30%                  |         |
| RAI                             |             |                      | 0.150   |
| No                              | 25%         | 8%                   |         |
| Yes                             | 67%         | 88%                  |         |
| RAI Uptake                      |             |                      | <0.001  |
| No uptake                       | 5%          | 4%                   |         |
| Thyroid bed                     | 37%         | 8%                   |         |
| Outside thyroid bed             | 23%         | 71%                  |         |
| Overall survival (died)         | 30%         | 37.5%                | 0.506   |
| Overall survival time (days±SD) | 1889±1331   | 2381±1551            | 0.148   |
| Survival analysis: HR (95%CI)   |             | HR: 0.87 (0.38-2.02) | 0.754   |

| <b>PDTC = 84</b>                       | <b>No fusions (73)</b> | <b>Fusions (11)</b> | <b>p value</b> |
|----------------------------------------|------------------------|---------------------|----------------|
| <b>Age (y)</b>                         | 58±16                  | 49±17               | 0.04           |
| <b>Gender (%F)</b>                     | 64%                    | 42%                 | 0.203          |
| <b>Family history TC(%yes)</b>         | 7%                     | 8%                  | 0.476          |
| <b>Tumor size</b>                      |                        |                     | 0.189          |
| ≤ 4                                    | 48%                    | 70%                 |                |
| >4                                     | 52%                    | 30%                 |                |
| <b>Pathology staging</b>               |                        |                     |                |
| T1/T2                                  | 12%                    | 22%                 |                |
| T3/T4                                  | 88%                    | 78%                 | 0.6            |
| Nx/N0                                  | 55%                    | 40%                 |                |
| N1a/N1b                                | 45%                    | 60%                 | 0.5            |
| M0                                     | 49%                    | 67%                 |                |
| M1                                     | 36%                    | 25%                 |                |
| Mx                                     | 15%                    | 8%                  | 0.622          |
| <b>RAI</b>                             |                        |                     | 0.558          |
| No                                     | 19%                    | 25%                 |                |
| Yes                                    | 72%                    | 75%                 |                |
| <b>RAI Uptake</b>                      |                        |                     | 1              |
| No uptake                              | 6%                     | 0%                  |                |
| Thyroid bed                            | 28%                    | 33%                 |                |
| Outside thyroid bed                    | 38%                    | 42%                 |                |
| <b>Overall survival (died)</b>         | 34%                    | 18%                 | 0.49           |
| <b>Overall survival time (days±SD)</b> | 2092±1444              | 1620±1080           | 0.30           |

| Total PDTC = 84                 | None(20)   | BRAF +(28) | RAS+ (24)  | Fusion + (11)        | p value          |
|---------------------------------|------------|------------|------------|----------------------|------------------|
| Age (y)                         | 58±16      | 53±18      | 64±12      | 49±17                | <b>0.04</b>      |
| Gender (%F)                     | 60%        | 82%        | 46%        | 42%                  | <b>0.02</b>      |
| Tobacco (%yes)                  | 59%        | 82%        | 52%        | 42%                  | <b>0.05</b>      |
| Tumor size                      |            |            | 0.201      | 5                    | <b>0.007</b>     |
| ≤ 4                             | 47%        | 68%        | 23%        | 70%                  |                  |
| >4                              | 53%        | 32%        | 77%        | 30%                  |                  |
| <b>Pathology staging</b>        |            |            |            |                      |                  |
| T1/T2                           | 14%        | 14%        | 9%         | 22%                  |                  |
| T3/T4                           | 86%        | 86%        | 91%        | 78%                  | 0.757            |
| Nx/N0                           | 36%        | 39%        | 87%        | 40%                  |                  |
| N1a/N1b                         | 64%        | <b>61%</b> | <b>13%</b> | 60%                  | <b>0.002</b>     |
| M0                              | 35%        | 79%        | 25%        | 67%                  |                  |
| M1                              | <b>30%</b> | <b>14%</b> | <b>67%</b> | <b>25%</b>           |                  |
| Mx                              | 35%        | 7%         | 8%         | 8%                   | <b>&lt;0.001</b> |
| RAI                             |            |            |            |                      | <b>0.043</b>     |
| No                              | 35%        | 18%        | 8%         | 25%                  |                  |
| Yes                             | 45%        | 79%        | 88%        | 75%                  |                  |
| RAI Uptake                      |            |            |            |                      | <b>0.001</b>     |
| No uptake                       | 0%         | 11%        | 4%         | 0%                   |                  |
| Thyroid bed                     | 25%        | 46%        | 8%         | 33%                  |                  |
| Outside thyroid bed             | <b>20%</b> | <b>21%</b> | <b>71%</b> | <b>42%</b>           |                  |
| Overall survival (died)         | 30%        | 36%        | 38%        | 17%                  | 0.644            |
| Overall survival time (days±SD) | 1674±1335  | 2206±1386  | 2381±1551  | 1509±1099            | 0.182            |
| Survival analysis: HR (95%CI)   |            |            |            | HR:0.85(0.55-1.1.34) | 0.493            |

**Supplementary Table S6. Clinicopathological characteristics of ATCs and PDCs according to *EIF1AX* mutation status.**

**A. Anaplastic thyroid cancers (ATC)**

| <b>Total ATC = 33</b>                  | <b>EIF1AXwt (30)</b> | <b>EIF1AX+ (3)</b>  | <b>p value</b> |
|----------------------------------------|----------------------|---------------------|----------------|
| <b>Age (y)</b>                         | 65.5±11              | 59±5.7              | 0.351          |
| <b>Gender (%F)</b>                     | 57%                  | 33%                 | 0.579          |
| <b>Tobacco (%yes)</b>                  | 28%                  | 33%                 | 1              |
| <b>Tumor size</b>                      | 6.1±2                | 7.6±1.9             | 0.252          |
| <b>Pathology staging</b>               |                      |                     |                |
| T2                                     | 1                    | 0                   |                |
| T3                                     | 2                    | 0                   |                |
| T4                                     | 19                   | 2                   |                |
| T4b                                    | 2                    | 1                   | 0.525          |
| N0                                     | 1                    | 0                   |                |
| N1a                                    | 2                    | 1                   |                |
| N1b                                    | 13                   | 2                   |                |
| Nx                                     | 6                    | 0                   | 0.372          |
| M0                                     | 0                    | 0                   |                |
| M1                                     | 13                   | 2                   |                |
| Mx                                     | 12                   | 1                   | 1              |
| <b>Mitotic activity</b>                |                      |                     | 1              |
| Mild                                   | 1                    | 0                   |                |
| Moderate                               | 3                    | 0                   |                |
| Marked                                 | 11                   | 3                   |                |
| <b>Necrosis</b>                        |                      |                     | 1              |
| None                                   | 3                    | 0                   |                |
| Present                                | 2                    | 0                   |                |
| Extensive                              | 11                   | 3                   |                |
| <b>Vascular invasion</b>               |                      |                     |                |
| No                                     | 3                    | 0                   |                |
| Yes                                    | 14                   | 3                   |                |
| <b>Extrathyroidal extension</b>        |                      |                     | 1              |
| No                                     | 2                    | 0                   |                |
| Minimal                                | 9                    | 1                   |                |
| Gross                                  | 10                   | 2                   |                |
| <b>Positive LN (mean num ± SD)</b>     | 4±3                  | 5.7±5               | 0.455          |
| <b>Largest LN (mean ± SD, cm)</b>      | 2±1.2                | 1.6±1.3             | 0.604          |
| <b>Extranodal extension</b>            | 6/8                  | 2/3                 | 1              |
| <b>Overall survival (died)</b>         | 61%                  | 100%                | 0.535          |
| <b>Overall survival time (days±SD)</b> | 283±662              | 250±75              | 0.934          |
| <b>Survival analysis: HR (95%CI)</b>   |                      | HR: 1.10(0.32-3.85) | 0.877          |

## B. Poorly differentiated thyroid cancers (PDTC)

| Total PDTC = 84                  | EIF1AXwt (75) | EIF1AX+ (9)               | p value      |
|----------------------------------|---------------|---------------------------|--------------|
| Age (y)                          | 56±17         | 67±8                      | <b>0.04</b>  |
| Gender (%F)                      | 61%           | 55%                       | 0.737        |
| Family history TC(%yes)          | 7%            | 11%                       | 0.268        |
| Tumor size                       |               |                           | <b>0.001</b> |
| ≤ 4                              | 57%           | 0%                        |              |
| >4                               | <b>43%</b>    | <b>100%</b>               |              |
| Pathology staging                |               |                           |              |
| T1/T2                            | 15%           | 0%                        |              |
| T3/T4                            | 85%           | 100%                      | 0.347        |
| Nx/N0                            | 47%           | 100%                      |              |
| N1a/N1b                          | <b>53%</b>    | <b>0%</b>                 | <b>0.003</b> |
| M0                               | 53%           | 33%                       |              |
| M1                               | 31%           | 67%                       |              |
| Mx                               | 16%           | 0%                        | 0.279        |
| RAI                              |               |                           | 0.839        |
| No                               | 21%           | 11%                       |              |
| Yes                              | 71%           | 89%                       |              |
| RAI Uptake                       |               |                           | 0.404        |
| No uptake                        | 5%            | 0%                        |              |
| Thyroid bed                      | 29%           | 22%                       |              |
| Outside thyroid bed              | 35%           | 67%                       |              |
| Overall survival (died)          | 29%           | 56%                       | 0.139        |
| Overall survival time (days ±SD) | 2073±1443     | 1667±1040                 | 0.416        |
| Survival analysis: HR (95% CI)   |               | <b>HR:2.6</b> (0.97-7.14) | <b>0.05</b>  |
| Logrank                          |               |                           | <b>0.048</b> |



**Supplementary Table S7. Clinicopathological characteristics of ATCs and PDTCs according to *TERT* promoter mutation status.**

**A. Anaplastic thyroid cancers (ATC)**

| Total ATC = 33                  |  | TERT wt (9) | TERT + (24)        | p value |
|---------------------------------|--|-------------|--------------------|---------|
| Age (y)                         |  | 60±12       | 67±10              | 0.08    |
| Gender (%F)                     |  | 44%         | 58%                | 0.476   |
| Tobacco (%yes)                  |  | 22%         | 30%                | 0.642   |
| Tumor size                      |  | 6.5±1.7     | 6.1±2.3            | 0.657   |
| Pathology staging               |  |             |                    |         |
| T2                              |  | 0           | 1                  | 0.288   |
| T3                              |  | 1           | 1                  |         |
| T4                              |  | 4           | 17                 |         |
| T4b                             |  | 2           | 1                  |         |
| N0                              |  | 1           | 0                  | 0.108   |
| N1a                             |  | 2           | 1                  |         |
| N1b                             |  | 4           | 11                 |         |
| Nx                              |  | 0           | 6                  |         |
| M0                              |  | 0           | 0                  | 0.577   |
| M1                              |  | 3           | 12                 |         |
| Mx                              |  | 5           | 8                  |         |
| Mitotic activity                |  |             |                    | 0.339   |
| Mild                            |  | 0           | 1                  | 0.225   |
| Moderate                        |  | 0           | 3                  |         |
| Marked                          |  | 7           | 7                  |         |
| Necrosis                        |  |             |                    | 0.225   |
| None                            |  | 0           | 3                  | 0.242   |
| Present                         |  | 0           | 2                  |         |
| Extensive                       |  | 7           | 7                  |         |
| Vascular invasion               |  |             |                    | 0.242   |
| No                              |  | 0           | 3                  | 1       |
| Yes                             |  | 8           | 9                  |         |
| Extrathyroidal extension        |  |             |                    | 1       |
| No                              |  | 1           | 1                  | 1       |
| Minimal                         |  | 3           | 7                  |         |
| Gross                           |  | 4           | 8                  |         |
| Positive LN (mean num ± SD)     |  | 3.6±3.6     | 4.8±3.3            | 0.477   |
| Largest LN (mean ± SD, cm)      |  | 1.2±1.3     | 2.3±1              | 0.150   |
| Extranodal extension            |  | 2/3         | 6/8                | 1       |
| Overall survival (died)         |  | 57%         | 67%                | 0.676   |
| Overall survival time (days±SD) |  | 732±1271    | 147±112            | 0.027   |
| Survival analysis: HR (95%CI)   |  |             | HR:2.2 (0.73-6.71) | 0.164   |

| <b>Total ATC = 33</b>                   | <b>None(5)</b> | <b>BRAF/RAS+(4)</b> | <b>TERT +<br/>(5)</b> | <b>RAF/RAS+TERT(19)</b> | <b>p<br/>value</b> |
|-----------------------------------------|----------------|---------------------|-----------------------|-------------------------|--------------------|
| <b>Age (y)</b>                          | 56±13          | 64.3±11             | 59±10                 | 69±8.5                  | 0.651              |
| <b>Gender (%F)</b>                      | 40%            | 50%                 | 60%                   | 58%                     | 0.947              |
| <b>Tobacco (%yes)</b>                   | 20%            | 25%                 | 50%                   | 26%                     | 0.856              |
| <b>Tumor size</b>                       | 6±1.5          | 6.9±2               | 7.5±1.7               | 5.8±2.3                 | 0.748              |
| <b>Pathology staging</b>                |                |                     |                       |                         |                    |
| T2                                      | 0              | 0                   | 0                     | 1                       | 0.185              |
| T3                                      | 1              | 0                   | 0                     | 1                       |                    |
| T4                                      | 1              | 3                   | 3                     | 14                      |                    |
| T4b                                     | 1              | 1                   | 1                     | 0                       |                    |
| N0                                      | 1              | 0                   | 0                     | 0                       | 0.194              |
| N1a                                     | 1              | 1                   | 0                     | 1                       |                    |
| N1b                                     | 1              | 3                   | 1                     | 10                      |                    |
| Nx                                      | 0              | 0                   | 2                     | 4                       |                    |
| M0                                      | 0              | 0                   | 0                     | 0                       | 0.071              |
| M1                                      | 1              | 2                   | 2                     | 10                      |                    |
| Mx                                      | 3              | 2                   | 0                     | 8                       |                    |
| <b>Mitotic activity</b>                 |                |                     |                       |                         | 0.738              |
| Mild                                    | 0              | 0                   | 0                     | 1                       | 0.644              |
| Moderate                                | 0              | 0                   | 0                     | 3                       |                    |
| Marked                                  | 4              | 3                   | 2                     | 5                       |                    |
| <b>Necrosis</b>                         |                |                     |                       |                         | 0.544              |
| None                                    | 0              | 0                   | 1                     | 2                       |                    |
| Present                                 | 0              | 0                   | 0                     | 2                       |                    |
| Extensive                               | 4              | 3                   | 1                     | 6                       | 0.841              |
| <b>Vascular invasion</b>                |                |                     |                       |                         |                    |
| No                                      | 0              | 0                   | 0                     | 3                       |                    |
| Yes                                     | 4              | 4                   | 2                     | 7                       | 0.416              |
| <b>Extrathyroidal extension</b>         |                |                     |                       |                         |                    |
| No                                      | 1              | 0                   | 0                     | 1                       |                    |
| Minimal                                 | 2              | 1                   | 1                     | 6                       | 0.730              |
| Gross                                   | 1              | 3                   | 1                     | 7                       |                    |
| <b>Positive LN (mean num ± SD)</b>      | 1.7±1.5        | 5±4.3               | 7±0                   | 4.5±3.4                 |                    |
| <b>Largest LN (mean ± SD, cm)</b>       | 0.1±0          | 1.6±1.3             | 3±0                   | 2.2±1                   |                    |
| <b>Extranodal extension</b>             | .              | 2/3                 | 1/1                   | 5/7                     | 1                  |
| <b>Overall survival (died)</b>          | 0              | 100%                | 40%                   | 74%                     | <b>0.020</b>       |
| <b>Overall survival time (days ±SD)</b> | 1382±50        | 245±62              | 138±58                | 150±124                 | <b>&lt;0.001</b>   |
| <b>Survival analysis: HR (95%CI)</b>    |                |                     |                       | HR: 1.5 (0.95-2.46)     | <b>0.08</b>        |

## B. Poorly differentiated thyroid cancers (PDTC)

| Total PDTC = 84                 | TERT wt (50) | TERT + (34)        | p value      |
|---------------------------------|--------------|--------------------|--------------|
| Age (y)                         | 53±17        | 62±14              | <b>0.01</b>  |
| Gender (%F)                     | 64%          | 56%                | 0.455        |
| Family history TC(%yes)         | 8%           | 6%                 | 1            |
| Tumor size                      |              |                    | 0.201        |
| ≤ 4                             | 57%          | 41%                |              |
| >4                              | 43%          | 59%                |              |
| Pathology staging               |              |                    |              |
| T1/T2                           | 16%          | 7%                 |              |
| T3/T4                           | 84%          | 93%                | 0.468        |
| Nx/N0                           | 56%          | 46%                |              |
| N1a/N1b                         | 44%          | 54%                | 0.448        |
| M0                              | 64%          | 32%                |              |
| M1                              | <b>20%</b>   | <b>56%</b>         |              |
| Mx                              | 16%          | 12%                | <b>0.013</b> |
| Encapsulation                   |              |                    | 0.484        |
| No                              | 38%          | 29%                |              |
| Partial                         | 20%          | 15%                |              |
| Complete                        | 26%          | 26%                |              |
| Capsular invasion               |              |                    | <b>0.05</b>  |
| No                              | 12%          | 0%                 |              |
| Yes                             | 24%          | 38%                |              |
| Vascular invasion               |              |                    | 0.401        |
| No                              | 27%          | 19%                |              |
| Yes                             | 73%          | 81%                |              |
| Extrathyroidal extension        |              |                    | 0.235        |
| No                              | 32%          | 22%                |              |
| Minimal                         | 33%          | 22%                |              |
| Gross                           | 35%          | 56%                |              |
| Multicentricity                 |              |                    | 0.597        |
| No                              | 44%          | 50%                |              |
| Yes                             | 40%          | 29%                |              |
| Margins compromised             |              |                    | 0.953        |
| No                              | 40%          | 44%                |              |
| Yes                             | 46%          | 41%                |              |
| RAI                             |              |                    | 0.599        |
| No                              | 24%          | 15%                |              |
| Yes                             | 68%          | 79%                |              |
| RAI Uptake                      |              |                    | <b>0.07</b>  |
| No uptake                       | 6%           | 3%                 |              |
| Thyroid bed                     | 36%          | 18%                |              |
| Outside thyroid bed             | 26%          | 53%                |              |
| Overall survival (died)         | 26%          | 41%                | 0.144        |
| Overall survival time (days±SD) | 2152±1263    | 1850±1595          | 0.337        |
| Survival analysis: HR (95%CI)   |              | HR: 1.7 (0.79-3.7) | 0.175        |

| Total PDTC = 52              |                     | BRAF/RAS alone (26) | BRAF/RAS+TERT (26) | p value      |
|------------------------------|---------------------|---------------------|--------------------|--------------|
| Age                          | (y)                 | 52±16               | 64±14              | <b>0.007</b> |
| Tumor size                   |                     |                     |                    | 0.171        |
|                              | ≤ 4                 | 58%                 | 38%                |              |
|                              | >4                  | 42%                 | 62%                |              |
| Pathology staging            |                     |                     |                    |              |
|                              | T1/T2               | 15%                 | 8%                 |              |
|                              | T3/T4               | 85%                 | 92%                | 0.668        |
|                              | Nx/N0               | 65%                 | 56%                |              |
|                              | N1a/N1b             | 35%                 | 44%                | 0.493        |
|                              | M0                  | 69%                 | 38%                |              |
|                              | M1                  | <b>23%</b>          | <b>54%</b>         |              |
|                              | Mx                  | 8%                  | 8%                 | <b>0.05</b>  |
| RAI                          |                     |                     |                    | 0.703        |
|                              | No                  | 19%                 | 8%                 |              |
|                              | Yes                 | 77%                 | 88%                |              |
| RAI Uptake                   |                     |                     |                    | 0.309        |
|                              | No uptake           | 12%                 | 9%                 |              |
|                              | Thyroid bed         | 35%                 | 23%                |              |
|                              | Outside thyroid bed | 31%                 | 58%                |              |
| OS (died)                    |                     | 23%                 | 50%                | <b>0.08</b>  |
| OS time (days±SD)            |                     | 2413±1266           | 2161±1633          | 0.536        |
| Survival analysis HR (95%CI) |                     |                     | HR: 1.5(0.94-2.49) | <b>0.09</b>  |

**Supplementary Table S8. Prevalence of common gene mutations in advanced thyroid cancers reported in the literature.** Summary of published studies reporting genetic alterations in PDTCs and/or ATCs for *BRAF*, *RAS*, *RET/PTC*, *TP53*, *PIK3CA*, *PTEN*, *AKT1*, *CTNNB1*, *AXIN1*, *APC*, *TERT* promoter and *EIF1AX*.

| Gene                  | Study (reference)                             | ATC          |             | PDTC         |             |
|-----------------------|-----------------------------------------------|--------------|-------------|--------------|-------------|
|                       |                                               | N            | %           | N            | %           |
| <b><i>BRAF</i></b>    | Nikiforova <i>et al</i> , 2003 (1)            | 3/29         | 10.3        | 2/16         | 12.5        |
|                       | Soares <i>et al</i> , 2004 <sup>1</sup> (2)   | 6/17         | 35.3        | 0/19         | 0.0         |
|                       | Garcia Rostan <i>et al</i> , 2005 (3)         | 19/69        | 27.5        | N/A          | N/A         |
|                       | Santarpia <i>et al</i> , 2008 (4)             | 2/18         | 11.1        | N/A          | N/A         |
|                       | Liu <i>et al</i> , 2008 <sup>#</sup> (5)      | 14/50        | 28.0        | N/A          | N/A         |
|                       | Costa <i>et al</i> , 2008 (6)                 | 9/36         | 25.0        | 4/24         | 16.7        |
|                       | Ricarte-Filho <i>et al</i> , 2009 (7)         | 8/18         | 44.4        | 4/34         | 11.8        |
|                       | Pita <i>et al</i> , 2014 (8)                  | 2/26         | 7.7         | 1/22         | 4.5         |
|                       | Kuntsman <i>et al</i> , 2015 (9)              | 6/22         | 27.3        | N/A          | N/A         |
|                       | <b>Current series</b>                         | <b>15/33</b> | <b>45.5</b> | <b>28/84</b> | <b>33.3</b> |
| <b><i>RAS</i></b>     | Manenti <i>et al</i> , 1994 (10)              | 1/5          | 20.0        | 3/11         | 27.3        |
|                       | Capella <i>et al</i> , 1996 (11)              | 8/13         | 61.5        | N/A          | N/A         |
|                       | Pilotti <i>et al</i> , 1997 <sup>1</sup> (12) | N/A          | N/A         | 5/8          | 62.5        |
|                       | Garcia Rostan <i>et al</i> , 2003 (13)        | 15/29        | 51.7        | 16/29        | 55.2        |
|                       | Hou <i>et al</i> , 2007 <sup>#</sup> (14)     | 4/50         | 8.0         | N/A          | N/A         |
|                       | Santarpia <i>et al</i> , 2008 (4)             | 2/18         | 11.1        | N/A          | N/A         |
|                       | Liu <i>et al</i> , 2008 <sup>#</sup> (5)      | 4/51         | 7.8         | N/A          | N/A         |
|                       | Costa <i>et al</i> , 2008 (6)                 | 13/36        | 36.1        | 11/24        | 45.8        |
|                       | Ricarte-Filho <i>et al</i> , 2009 (7)         | 4/18         | 22.2        | 15/34        | 44.1        |
|                       | Pita <i>et al</i> , 2014 (8)                  | 8/26         | 30.8        | 4/22         | 18.2        |
|                       | Kuntsman <i>et al</i> , 2015 (9)              | 4/22         | 18.2        | N/A          | N/A         |
|                       | <b>Current series</b>                         | <b>8/33</b>  | <b>24.2</b> | <b>24/84</b> | <b>28.6</b> |
| <b><i>RET/PTC</i></b> | Santoro <i>et al</i> , 1992 (15)              | 0/15         | 0.0         | N/A          | N/A         |
|                       | Santoro <i>et al</i> , 2002 (16)              | N/A          | N/A         | 8/62         | 12.9        |
|                       | Ricarte-Filho <i>et al</i> , 2009 (7)         | 0/18         | 0.0         | 6/34         | 17.6        |
|                       | Kuntsman <i>et al</i> , 2015 (9)              | N/A          | N/A         | N/A          | N/A         |
|                       | <b>Current series</b>                         | <b>0/33</b>  | <b>0.0</b>  | <b>5/84</b>  | <b>6.0</b>  |

Supplementary Table S8. (continued)

| Gene   | Study (reference)                                      | ATC   |      | PDTC       |           |
|--------|--------------------------------------------------------|-------|------|------------|-----------|
|        |                                                        | N     | %    | N          | %         |
| TP53   | Ito <i>et al</i> , 1992 (17)                           | 6/7   | 85.7 | N/A        | N/A       |
|        | Nakamura <i>et al</i> , 1992 (18)                      | 2/9   | 22.2 | N/A        | N/A       |
|        | Fagin <i>et al</i> , 1993 (19)                         | 5/6   | 83.3 | N/A        | N/A       |
|        | Donghi <i>et al</i> , 1993 (20)                        | 5/7   | 71.4 | 2/8        | 25.0      |
|        | Dobashi <i>et al</i> , 1994 <sup>2</sup> (21)          | 4/6   | 66.7 | 2/6        | 33.3      |
|        | Ho <i>et al</i> , 1996 (22)                            | 0/4   | 0.0  | 5/29       | 17.2      |
|        | Takeuchi <i>et al</i> , 1999 <sup>1</sup> (23)         | N/A   | N/A  | 14/46      | 30.4      |
|        | Pita <i>et al</i> , 2014 (8)                           | 11/26 | 42.3 | 6/22       | 27.3      |
|        | Kuntsman <i>et al</i> , 2015 (9)                       | 6/22  | 27.3 | N/A        | N/A       |
|        | Current series                                         | 24/33 | 72.7 | 7/84       | 8.3       |
| PIK3CA | Garcia Rostan <i>et al</i> , 2005 <sup>3</sup> (3)     | 16/70 | 22.9 | N/A        | N/A       |
|        | Hou <i>et al</i> , 2007 <sup>4, #</sup> (14)           | 6/50  | 12.0 | N/A        | N/A       |
|        | Santarpia...Sherman, 2008 (4)                          | 4/18  | 22.2 | N/A        | N/A       |
|        | Ricarte-Filho <i>et al</i> , 2009 (7)                  | 1/18  | 5.6  | 2/34       | 5.9       |
|        | Pita <i>et al</i> , 2014 (8)                           | 1/26  | 3.8  | 3/22       | 13.6      |
|        | Kuntsman <i>et al</i> , 2015 (9)                       | 2/22  | 9.1  | N/A        | N/A       |
|        | Current series                                         | 6/33  | 18.2 | 2/84       | 2.4       |
| PTEN   | Hou <i>et al</i> , 2007 <sup>4, #</sup> (14)           | 8/50  | 16.0 | N/A        | N/A       |
|        | Santarpia <i>et al</i> , 2008 (4)                      | 2/18  | 11.1 | N/A        | N/A       |
|        | Pita <i>et al</i> , 2014 (8)                           | 2/20  | 10.0 | 3/15       | 20.0      |
|        | Kuntsman <i>et al</i> , 2015 (9)                       | 0/22  | 0.0  | N/A        | N/A       |
|        | Current series                                         | 5/33  | 15.2 | 3/84       | 3.6       |
| AKT1   | Liu <i>et al</i> , 2008 <sup>#</sup> (5)               | 0/47  | 0.0  | N/A        | N/A       |
|        | Ricarte-Filho <i>et al</i> , <sup>5</sup> (7)          | 0/18  | 0.0  | 0/34, 6/32 | 0.0, 18.8 |
|        | Kuntsman <i>et al</i> , 2015 (9)                       | 0/22  | 0.0  | N/A        | N/A       |
|        | Current series                                         | 0/33  | 0.0  | 0/84       | 0.0       |
| CTNNB1 | Garcia Rostan <i>et al</i> , 1999 <sup>6, *</sup> (24) | 19/31 | 61.3 | N/A        | N/A       |
|        | Garcia Rostan <i>et al</i> , 2001 <sup>*</sup> (25)    | 19/29 | 65.5 | 7/28       | 25.0      |
|        | Kurihara <i>et al</i> , 2004 <sup>7</sup> (26)         | 1/22  | 4.5  | N/A        | N/A       |
|        | Pita <i>et al</i> , 2014 <sup>8</sup> (8)              | 0/26  | 0.0  | 1/22       | 4.5       |
|        | Kuntsman <i>et al</i> , 2015 (9)                       | 1/22  | 4.5  | N/A        | N/A       |
|        | Current series <sup>9</sup>                            | 0/33  | 0.0  | 1/84       | 1.2       |
| AXIN1  | Kurihara <i>et al</i> , 2004 <sup>7</sup> (26)         | 18/22 | 81.8 | N/A        | N/A       |
|        | Kuntsman <i>et al</i> , 2015 (9)                       | 0/22  | 0.0  | N/A        | N/A       |
|        | Current series <sup>10</sup>                           | 1/33  | 3.0  | 1/84       | 1.2       |

**Supplementary Table S8.** (continued)

| Gene                     | Study (reference)                                 | ATC    |      | PDTC  |      |
|--------------------------|---------------------------------------------------|--------|------|-------|------|
|                          |                                                   | N      | %    | N     | %    |
| <b>APC</b>               | Kurihara <i>et al</i> , 2004 <sup>7</sup> (26)    | 2/22   | 9.1  | N/A   | N/A  |
|                          | Kuntsman <i>et al</i> , 2015 (9)                  | 0/22   | 0.0  | N/A   | N/A  |
|                          | Current series                                    | 1/33   | 3.0  | 0/84  | 0.0  |
| <b>TERT<br/>promoter</b> | Liu <i>et al</i> , 2013 <sup>§</sup> (27)         | 25/54  | 46.3 | 3/8   | 37.5 |
|                          | Landa <i>et al</i> , 2013 <sup>11</sup> (28)      | 10/20  | 50.0 | 30/58 | 51.7 |
|                          | Vinagre <i>et al</i> , 2013 <sup>&amp;</sup> (29) | 2/16   | 12.5 | 3/14  | 21.4 |
|                          | Liu <i>et al</i> , 2013 (30)                      | 10/20  | 50.0 | N/A   | N/A  |
|                          | Melo <i>et al</i> , 2014 <sup>&amp;</sup> (31)    | 12/36  | 33.3 | 9/31  | 29.0 |
|                          | Shi <i>et al</i> , 2015 <sup>§</sup> (32)         | 41/106 | 38.7 | N/A   | N/A  |
|                          | Kuntsman <i>et al</i> , 2015 (9)                  | N/A    | N/A  | N/A   | N/A  |
|                          | Current series <sup>11</sup>                      | 24/33  | 72.7 | 34/84 | 40.5 |
| <b>EIF1AX</b>            | Kuntsman <i>et al</i> , 2015 (9)                  | 3/22   | 13.6 | N/A   | N/A  |
|                          | Current series                                    | 3/33   | 9.1  | 9/84  | 10.7 |

<sup>1</sup> Only "insular and insular-like" PDTCs were studied.

<sup>2</sup> Cases with negative p53 immunostaining were not sequenced for *TP53* mutations.

<sup>3</sup> Among *PIK3CA* mutations there are some canonical (E542K found in one tumor and H1047R in three) and some non-canonical events. Paired normals were available for 22/70 ATCs.

<sup>4</sup> It is unclear whether paired normals were available. Reported *PIK3CA* mutations are non-canonical; PTEN mutations are all missense

<sup>5</sup> *AKT1* mutations found exclusively on metastatic/recurrent PDTC but not on primary tumors

<sup>6</sup> No paired normals available; all *CTNNB1* mutations cluster on exon 3

<sup>7</sup> Paired normals available at least for some tumors, unclear if for all

<sup>8</sup> Only seven paired normals available

<sup>9</sup> *CTNNB1* mutation not in COSMIC and different from those reported.

<sup>10</sup> *AXIN1* mutations not confirmed somatic.

<sup>11</sup> 20/33 ATCs and 17/84 PDTCs were evaluated for *TERT* mutations in both studies

<sup>#</sup> These two papers used overlapping series of ATCs (n=50 vs. 51)

<sup>\*</sup> These two papers used overlapping series of ATCs (n=31 vs. 29)

<sup>§</sup> 49 ATCs from Shi, 2015 already reported in Liu, 2013

<sup>&</sup> Probably partially overlapping series

1. Nikiforova MN, Kimura ET, Gandhi M, Biddinger PW, Knauf JA, Basolo F, et al. BRAF mutations in thyroid tumors are restricted to papillary carcinomas and anaplastic or poorly differentiated carcinomas arising from papillary carcinomas. *J Clin Endocrinol Metab.* 2003;88:5399-404.
2. Soares P, Trovisco V, Rocha AS, Lima J, Castro P, Preto A, et al. BRAF mutations and RET/PTC rearrangements are alternative events in the etiopathogenesis of PTC. *Oncogene.* 2003;22:4578-80.
3. Garcia-Rostan G, Costa AM, Pereira-Castro I, Salvatore G, Hernandez R, Hermsem MJ, et al. Mutation of the PIK3CA gene in anaplastic thyroid cancer. *Cancer Res.* 2005;65:10199-207.
4. Santarpia L, El-Naggar AK, Cote GJ, Myers JN, Sherman SI. Phosphatidylinositol 3-kinase/akt and ras/raf-mitogen-activated protein kinase pathway mutations in anaplastic thyroid cancer. *J Clin Endocrinol Metab.* 2008;93:278-84.
5. Liu Z, Hou P, Ji M, Guan H, Studeman K, Jensen K, et al. Highly prevalent genetic alterations in receptor tyrosine kinases and phosphatidylinositol 3-kinase/akt and mitogen-activated protein kinase pathways in anaplastic and follicular thyroid cancers. *J Clin Endocrinol Metab.* 2008;93:3106-16.
6. Costa AM, Herrero A, Fresno MF, Heymann J, Alvarez JA, Cameselle-Teijeiro J, et al. BRAF mutation associated with other genetic events identifies a subset of aggressive papillary thyroid carcinoma. *Clin Endocrinol (Oxf).* 2008;68:618-34.
7. Ricarte-Filho JC, Ryder M, Chitale DA, Rivera M, Heguy A, Ladanyi M, et al. Mutational profile of advanced primary and metastatic radioactive iodine-refractory thyroid cancers reveals distinct pathogenetic roles for BRAF, PIK3CA, and AKT1. *Cancer Res.* 2009;69:4885-93.
8. Pita JM, Figueiredo IF, Moura MM, Leite V, Cavaco BM. Cell cycle deregulation and TP53 and RAS mutations are major events in poorly differentiated and undifferentiated thyroid carcinomas. *J Clin Endocrinol Metab.* 2014;99:E497-507.
9. Kunstman JW, Juhlin CC, Goh G, Brown TC, Stenman A, Healy JM, et al. Characterization of the mutational landscape of anaplastic thyroid cancer via whole-exome sequencing. *Hum Mol Genet.* 2015;24:2318-29.
10. Manenti G, Pilotti S, Re FC, Della Porta G, Pierotti MA. Selective activation of ras oncogenes in follicular and undifferentiated thyroid carcinomas. *Eur J Cancer.* 1994;30A:987-93.
11. Capella G, Matias-Guiu X, Ampudia X, de Leiva A, Perucho M, Prat J. Ras oncogene mutations in thyroid tumors: polymerase chain reaction-restriction-fragment-length polymorphism analysis from paraffin-embedded tissues. *Diagnostic molecular pathology : the American journal of surgical pathology, part B.* 1996;5:45-52.
12. Pilotti S, Collini P, Mariani L, Placucci M, Bongarzone I, Vigneri P, et al. Insular carcinoma: a distinct de novo entity among follicular carcinomas of the thyroid gland. *Am J Surg Pathol.* 1997;21:1466-73.
13. Garcia-Rostan G, Zhao H, Camp RL, Pollan M, Herrero A, Pardo J, et al. ras mutations are associated with aggressive tumor phenotypes and poor prognosis in thyroid cancer. *J Clin Oncol.* 2003;21:3226-35.
14. Hou P, Liu D, Shan Y, Hu S, Studeman K, Condouris S, et al. Genetic alterations and their relationship in the phosphatidylinositol 3-kinase/Akt pathway in thyroid cancer. *Clin Cancer Res.* 2007;13:1161-70.
15. Santoro M, Carlomagno F, Hay ID, Herrmann MA, Grieco M, Melillo R, et al. Ret oncogene activation in human thyroid neoplasms is restricted to the papillary cancer subtype. *J Clin Invest.* 1992;89:1517-22.
16. Santoro M, Papotti M, Chiappetta G, Garcia-Rostan G, Volante M, Johnson C, et al. RET activation and clinicopathologic features in poorly differentiated thyroid tumors. *J Clin Endocrinol Metab.* 2002;87:370-9.



17. Ito T, Seyama T, Mizuno T, Tsuyama N, Hayashi T, Hayashi Y, et al. Unique association of p53 mutations with undifferentiated but not with differentiated carcinomas of the thyroid gland. *Cancer Res.* 1992;52:1369-71.
18. Nakamura T, Yana I, Kobayashi T, Shin E, Karakawa K, Fujita S, et al. p53 gene mutations associated with anaplastic transformation of human thyroid carcinomas. *Japanese journal of cancer research : Gann.* 1992;83:1293-8.
19. Fagin JA, Matsuo K, Karmakar A, Chen DL, Tang SH, Koeffler HP. High prevalence of mutations of the p53 gene in poorly differentiated human thyroid carcinomas. *J Clin Invest.* 1993;91:179-84.
20. Donghi R, Longoni A, Pilotti S, Michieli P, Della Porta G, Pierotti MA. Gene p53 mutations are restricted to poorly differentiated and undifferentiated carcinomas of the thyroid gland. *J Clin Invest.* 1993;91:1753-60.
21. Dobashi Y, Sugimura H, Sakamoto A, Mernyei M, Mori M, Oyama T, et al. Stepwise participation of p53 gene mutation during dedifferentiation of human thyroid carcinomas. *Diagnostic molecular pathology : the American journal of surgical pathology, part B.* 1994;3:9-14.
22. Ho YS, Tseng SC, Chin TY, Hsieh LL, Lin JD. p53 gene mutation in thyroid carcinoma. *Cancer Lett.* 1996;103:57-63.
23. Takeuchi Y, Daa T, Kashima K, Yokoyama S, Nakayama I, Noguchi S. Mutations of p53 in thyroid carcinoma with an insular component. *Thyroid.* 1999;9:377-81.
24. Garcia-Rostan G, Tallini G, Herrero A, D'Aquila TG, Carcangiu ML, Rimm DL. Frequent mutation and nuclear localization of beta-catenin in anaplastic thyroid carcinoma. *Cancer Res.* 1999;59:1811-5.
25. Garcia-Rostan G, Camp RL, Herrero A, Carcangiu ML, Rimm DL, Tallini G. Beta-catenin dysregulation in thyroid neoplasms: down-regulation, aberrant nuclear expression, and CTNNB1 exon 3 mutations are markers for aggressive tumor phenotypes and poor prognosis. *Am J Pathol.* 2001;158:987-96.
26. Kurihara T, Ikeda S, Ishizaki Y, Fujimori M, Tokumoto N, Hirata Y, et al. Immunohistochemical and sequencing analyses of the Wnt signaling components in Japanese anaplastic thyroid cancers. *Thyroid.* 2004;14:1020-9.
27. Liu X, Bishop J, Shan Y, Pai S, Liu D, Murugan AK, et al. Highly prevalent TERT promoter mutations in aggressive thyroid cancers. *Endocr Relat Cancer.* 2013;20:603-10.
28. Landa I, Ganly I, Chan TA, Mitsutake N, Matsuse M, Ibrahimpasic T, et al. Frequent somatic TERT promoter mutations in thyroid cancer: higher prevalence in advanced forms of the disease. *J Clin Endocrinol Metab.* 2013;98:E1562-6.
29. Vinagre J, Almeida A, Populo H, Batista R, Lyra J, Pinto V, et al. Frequency of TERT promoter mutations in human cancers. *Nature communications.* 2013;4:2185.
30. Liu T, Wang N, Cao J, Sofiadis A, Dinets A, Zedenius J, et al. The age- and shorter telomere-dependent TERT promoter mutation in follicular thyroid cell-derived carcinomas. *Oncogene.* 2013.
31. Melo M, Rocha AG, Vinagre J, Batista R, Peixoto J, Tavares C, et al. TERT promoter mutations are a major indicator of poor outcome in differentiated thyroid carcinomas. *J Clin Endocrinol Metab.* 2014;jc20133734.
32. Shi X, Liu R, Qu S, Zhu G, Bishop J, Liu X, et al. Association of TERT promoter mutation 1,295,228 C>T with BRAF V600E mutation, older patient age, and distant metastasis in anaplastic thyroid cancer. *J Clin Endocrinol Metab.* 2015;100:E632-7.
